# Supplementary material for: Predicting postoperative fatigue in surgically treated lung cancer patients in Norway: a longitudinal 5-month follow-up study
Source: PubMed Central journal article supplement — BMJ Open. 2019 Sep 27;9(9):e028192. doi: 10.1136/bmjopen-2018-028192 (PMC6773303; doi:10.1136/bmjopen-2018-028192), 2019-09-27
Supplement: bmjopen-2018-028192.draft_revisions.pdf [file bmjopen-2018-028192.draft_revisions.pdf]

# BMJ Open

BMJ Open is committed to open peer review. As part of this commitment we make the peer review history of every article we publish publicly available.

When an article is published we post the peer reviewers' comments and the authors' responses online. We also post the versions of the paper that were used during peer review. These are the versions that the peer review comments apply to.

The versions of the paper that follow are the versions that were submitted during the peer review process. They are not the versions of record or the final published versions. They should not be cited or distributed as the published version of this manuscript.

BMJ Open is an open access journal and the full, final, typeset and author-corrected version of record of the manuscript is available on our site with no access controls, subscription charges or pay-per-view fees (<http://bmjopen.bmj.com>).

If you have any questions on BMJ Open's open peer review process please email [info.bmjopen@bmj.com](mailto:info.bmjopen@bmj.com)

# BMJ Open

## Predicting postoperative fatigue in surgically treated lung cancer patients – a longitudinal five-month follow-up study.

|                               |                                                                                                                                                                                                                                                                                                                                                                                                                                                                                                                                                                    |
|-------------------------------|--------------------------------------------------------------------------------------------------------------------------------------------------------------------------------------------------------------------------------------------------------------------------------------------------------------------------------------------------------------------------------------------------------------------------------------------------------------------------------------------------------------------------------------------------------------------|
| Journal:                      | <i>BMJ Open</i>                                                                                                                                                                                                                                                                                                                                                                                                                                                                                                                                                    |
| Manuscript ID                 | bmjopen-2018-028192                                                                                                                                                                                                                                                                                                                                                                                                                                                                                                                                                |
| Article Type:                 | Research                                                                                                                                                                                                                                                                                                                                                                                                                                                                                                                                                           |
| Date Submitted by the Author: | 26-Nov-2018                                                                                                                                                                                                                                                                                                                                                                                                                                                                                                                                                        |
| Complete List of Authors:     | Hugoy, Therese ; University of Oslo, Institute of Health and Society, Faculty of Medicine, ; Lovisenberg Diakonale Hogskole Lerdal, Anners; University of Oslo, Dept. of Nursing Science; Lovisenberg Diakonale Hospital, Dept. of Research<br>Rustoen, Tone; University of Oslo, Norway, Institute of Health and Society, Faculty of Medicine; Oslo universitetssykehus Ulleval, Department of Research and Development, Division of Emergencies and Critical Care<br>Oksholm, Trine; VID Vitenskapelige Hogskole, Faculty of Health Studies, Campus Haraldsplass |
| Keywords:                     | Fatigue, Lung Cancer, Neoplasm, Quality of Life, SURGERY                                                                                                                                                                                                                                                                                                                                                                                                                                                                                                           |
|                               |                                                                                                                                                                                                                                                                                                                                                                                                                                                                                                                                                                    |

SCHOLARONE™  
Manuscripts

1  
2  
3 **Predicting postoperative fatigue in surgically treated lung cancer patients – a**  
4 **longitudinal five-month follow-up study.**  
5  
6

7 Therese Hugøy<sup>a,b,c</sup>, Anners Lerdal<sup>a,d</sup> Tone Rustøen<sup>a,e</sup>, Trine Oksholm<sup>f</sup>  
8  
9

10  
11 <sup>a</sup>Department of Nursing Science, Institute of Health and Society, Faculty of Medicine,  
12 University of Oslo, Norway.  
13

14 <sup>b</sup>Centre for Patient centered heart- and lung research. Department of cardiothoracic surgery.  
15 Division of Cardiovascular and Pulmonary Diseases. Oslo University Hospital, Oslo, Norway.  
16 (T.H.)  
17

18  
19 <sup>c</sup>Lovisenberg Diaconal University College, Lovisenberggt. 15B, 0456 Oslo  
20

21 <sup>d</sup>Department for Patient Safety and Research, Lovisenberg Diaconal Hospital, P.O. Box 4970  
22 Nydalen, 0440 Oslo, Norway  
23

24  
25 <sup>e</sup> Department of Research and Development, Division of Emergencies and Critical Care, Oslo  
26 University Hospital, P.O. Box 4956 Nydalen, 0424 Oslo, Norway;  
27

28 <sup>f</sup> VID Specialized University, Faculty of Health Studies, Campus Haraldsplass, P.O. Box 184  
29 Vinderen, 0319 Oslo, Norway  
30  
31

32  
33  
34 \*Corresponding author at:  
35 Trine Oksholm  
36 trine.oksholm@vid.no  
37  
38  
39  
40  
41

42 Word count: 3026  
43  
44  
45  
46  
47  
48  
49  
50  
51  
52  
53  
54  
55  
56  
57  
58  
59  
60

1  
2  
3 ABSTRACT  
4

5 *Objectives:* Despite the negative influence of fatigue on quality of life in patients who  
6  
7 undergo lung cancer surgery, little is known about the possible predictors of postoperative  
8  
9 fatigue. The aim of this study was to examine demographic and clinical characteristics that  
10  
11 might predict postoperative fatigue five months after lung cancer surgery.  
12  
13

14 *Design:* A prospective longitudinal follow up study comprising pre- and postoperative  
15  
16 questionnaires, including Lee Fatigue Scale, and sociodemographic and clinical data.  
17  
18

19 *Setting:* Three university hospitals in Norway (e.g., Oslo University Hospital, St. Olav  
20  
21 University Hospital, Haukeland University Hospital).  
22  
23

24 *Participants:* In total, 196 surgically treated patients who answered the questionnaires both  
25  
26 preoperatively and at five-month follow-up with valid fatigue scores.  
27  
28

29 *Results:* Bivariate analyses showed that preoperative fatigue was associated with  
30  
31 comorbidities and the symptoms of shortness of breath, cough, depression, anxiety, sleep  
32  
33 disturbance, and pain. Only cough was directly associated with preoperative fatigue in a  
34  
35 regression model. Comorbidities and the symptoms of shortness of breath, cough, depression,  
36  
37 and sleep disturbance were associated with postoperative fatigue in the bivariate analyses, but  
38  
39 only shortness of breath was associated with postoperative fatigue in the regression model.  
40  
41 We did not find any significant correlations between fatigue and any treatment variable.  
42  
43

44 *Conclusion:* Clinicians should pay special attention to lung symptoms and be aware that these  
45  
46 may lead to long-term postoperative fatigue. Further research should examine whether  
47  
48 interventions reducing lung symptoms, such as shortness of breath and coughing, may prevent  
49  
50 development of fatigue in patients undergoing lung cancer surgery.  
51  
52

53  
54  
55  
56 *Key words:* Fatigue, Lung Cancer, Neoplasm, Quality of Life, Surgery  
57  
58  
59  
60

### Strengths and limitations of this study

- A rather large sample of surgically treated lung cancer patients were included in the study
- Patients' fatigue was measured both preoperatively and after surgery
- Several clinical, treatment and medical variables as well as symptoms that might be related to fatigue was assessed
- There was a five-month gap between the two measurement points. During this time, other factors might have influenced patients' fatigue experience.
- There were limited information on symptom management interventions such as physiotherapy and rehabilitation

### 1. Introduction

Lung cancer (LC) is presently one of the most common malignancies, and it is estimated that 20% of cancer-related deaths are caused by LC,[1]. Only 20% of patients diagnosed with non-small-cell lung cancer meet the criteria for surgery due to their late stage at diagnosis; for these patients, surgery may be curative,[2]. In Norway during 2014, five-year LC survival was generally 19% in women and 13% in men,[1]. In surgically treated patients, the five-year survival ranges from 50% to 70%, depending on the tumor stage at surgery.

Fatigue is common among cancer patients. An estimated 75–90% of LC patients report fatigue after cancer treatment,[3,4]. Fatigue has been described as a complex, multidimensional symptom and has been defined as a sense of exhaustion, lack of energy, or tiredness distinct from sleepiness, sadness, or weakness,[5]. Cancer-related fatigue is related to cancer or its treatment, and interferes with usual functioning,[3]. Fatigue has a negative impact on patients' health-related quality of life (HRQOL),[6], their ability to receive treatment, and their long-term prognosis. Although there are limited data on LC and fatigue in patients who have undergone surgery, it has been shown that fatigue has a negative impact on

1  
2  
3 HRQOL in LC survivors,[7]. One study showed that fatigue was a significant predictor of  
4 survival at each time point assessed,[8]. In another study on symptom severity after  
5 thoracotomy, fatigue was reported as the most common and severe symptom at every time  
6 point,[7].  
7  
8  
9  
10  
11

12 Several studies have reported interrelations between fatigue, cough, and dyspnea,[8–  
13 11]. Fatigue is also strongly related to symptoms of depression and anxiety,[12,13].  
14 Associations between fatigue and sex, pain, insomnia, and dyspnea have also been  
15 reported,[12,14]. Studies on fatigue in populations with lung cancer in different stages have  
16 also shown strong correlations between fatigue and sleep disturbance,[6,15–17]. Sarna et  
17 al.,[12] found that symptom severity in surgical patients was related to the extent of their  
18 comorbid condition. Other studies of LC patients have also shown correlations between  
19 comorbidities and fatigue,[6], as well as strong correlations between pulmonary diseases such  
20 as COPD and asthma, and fatigue,[3,18]. Fatigue has a negative impact on both LC patients  
21 and survivors in general,[19]; however, to our knowledge, there have been no studies to date  
22 specifically investigating fatigue in surgically treated LC patients.  
23  
24  
25  
26  
27  
28  
29  
30  
31  
32  
33  
34  
35  
36

37 Thus, our aim was to examine the relationships between fatigue and disease  
38 characteristics, treatment, and other symptoms. We hypothesized that fatigue levels at five-  
39 month follow-up would be significantly related to: (1) clinical variables (preoperative  
40 comorbidities, forced expiratory volume in one second [FEV1], and forced vital capacity  
41 [FVC]); (2) preoperative symptoms (shortness of breath, coughing, depression, anxiety, pain,  
42 and sleep disturbance); and (3) treatment and medical variables (surgery type, cancer stage,  
43 and adjuvant therapy).  
44  
45  
46  
47  
48  
49  
50  
51  
52  
53

## 54 **2. Material and methods**

55  
56  
57 This study is part of a larger, longitudinal investigation of symptoms in LC patients who  
58 were eligible for surgery,[20–22] for which data were collected prior to surgery and  
59  
60

1  
2  
3 prospectively at four time points up to one year after surgery. Here, we analyzed the data  
4  
5 collected prior to surgery and at the five-month follow-up to gain insight into patients'  
6  
7 experiences with fatigue before surgery and after the immediate postoperative period.  
8  
9

### 10 11 *2.1. Patients and settings*

12  
13 Patients were included if they were 18 years or older, scheduled for primary LC surgery,  
14  
15 and could understand, read, and write Norwegian. Patients with a benign or metastatic  
16  
17 disease, whose surgery was canceled, or who had cognitive impairment, were excluded. We  
18  
19 recruited patients from three university hospitals in Norway: Oslo University Hospital, St.  
20  
21 Olav University Hospital, and Haukeland University Hospital.  
22  
23  
24  
25

### 26 27 *2.2. Study procedures*

28  
29 Hospital research staff approached patients and explained the study purpose: 91% of the  
30  
31 participants were recruited in the hospital 1–3 days before surgery, and the remainder in  
32  
33 outpatient clinics prior to surgery. The patients completed several self-report questionnaires  
34  
35 with information on sociodemographic and clinical characteristics, and symptoms both prior  
36  
37 to surgery and at a five-month follow-up. Data on type of tumor, cancer stage, surgery type,  
38  
39 and lung function were collected from the patients' medical records. FEV1 and FVC were  
40  
41 measured preoperatively using a spirometer. Five months after surgery, patients received  
42  
43 questionnaires by regular mail, along with a postage-paid return envelope.  
44  
45  
46  
47

### 48 49 *2.3. Instruments and assessment*

#### 50 51 *2.3.1. Sociodemographic, clinical, symptom, and fatigue characteristics*

52  
53 Patients provided information on their sex, marital status, living situation, level of  
54  
55 education, and employment status. Information on age, smoking status, FEV1, tumor  
56  
57 histology, cancer stage, type of surgery, pre- and postoperative treatment, postoperative  
58  
59  
60

1  
2  
3 complications, and TNM classification were collected from patients' medical records; the  
4  
5 TNM classification is a system for cancer staging based on tumor (T), node (N), and  
6  
7 metastasis (M).  
8  
9

### 10 2.3.2. Comorbidities

11  
12 Comorbidities were measured using the Self-administered Comorbidity Questionnaire-  
13  
14 19 (SCQ-19),[23] on which scores can range from 0 to 57, with a higher score indicating a  
15  
16 more severe comorbidity profile. The SCQ includes 16 comorbidities and three optional  
17  
18 conditions. Patients indicated whether or not they had the comorbid condition (yes/no); if they  
19  
20 had the condition they were asked if they received treatment for it; and finally if it limited  
21  
22 their activities. The SCQ-19 has well-established validity and reliability and has been used to  
23  
24 assess comorbidity in Norwegian oncology patients,[23]. Only the number of comorbidities  
25  
26 was used in the present study.  
27  
28  
29  
30

### 31 2.3.3. Fatigue

32  
33 The Lee Fatigue Scale (LFS),[5] was used to measure fatigue at baseline and five-month  
34  
35 follow-up. The LFS consists of 18 items designed to assess fatigue (13 items) and energy (5  
36  
37 items). We used only the 13 fatigue items in this study. Patients were asked to rate each item  
38  
39 on a 0–10 scale, with a higher score indicating greater fatigue severity. A fatigue score was  
40  
41 calculated using the mean of the 13 items at each measurement. The LFS has well-established  
42  
43 validity and reliability,[24,25]. Fatigue scores at baseline were defined as preoperative fatigue  
44  
45 and at five-month follow-up as postoperative fatigue.  
46  
47  
48  
49

### 50 2.3.4. Shortness of breath and cough

51  
52 The European Organization for Research and Treatment of Cancer Quality-of-Life  
53  
54 Questionnaire – Lung Cancer Module (EORTC QLQ-LC13),[26] was used to measure  
55  
56 shortness of breath and cough. Patients were asked to rate their severity on each shortness of  
57  
58 breath and cough item using a four-point Likert scale where 1 = not at all; 2 = a little; 3 =  
59  
60



1  
2  
3 quite a bit; and 4 = very much. The EORTC QLQ-LC13 has been validated in Norwegian LC  
4  
5 patients,[27,28].  
6  
7

### 8 *2.3.5. Depression*

9  
10 The Center for Epidemiologic Studies – Depression Scale (CES-D),[29] was used to  
11  
12 measure depression symptoms. The scale has 20 items related to depression and patients were  
13  
14 asked to report how they felt during the past week. Each item was rated on a four-point Likert  
15  
16 scale and scores ranged from 0 to 60, with a higher score indicating a higher level of  
17  
18 depression. A total depression score was calculated as the mean of all the sub scores.  
19  
20 Acceptable reliability and validity have been reported in a previous study,[30].  
21  
22  
23  
24

### 25 *2.3.6. Anxiety*

26  
27 The State-Trait Anxiety Inventory (STAI, Y-2),[31] was used to measure anxiety. The  
28  
29 STAI includes 20 items related to anxiety rated on a four-point Likert scale. Scores range  
30  
31 from 20 to 80, with a higher score indicating a higher level of anxiety. The STAI has been  
32  
33 validated in LC patients,[32].  
34  
35  
36

### 37 *2.3.7. Sleep disturbance*

38  
39 The General Sleep Disturbance Scale (GSDS),[33] was used to measure sleep  
40  
41 disturbance. The GSDS consists of 21 items related to sleep disturbance. Each item is rated on  
42  
43 a numeric rating scale ranging from 0 (never) to 7 (every day). A sleep disturbance score was  
44  
45 calculated from the mean of all scale items. Higher scores indicate more severe sleep  
46  
47 disturbance. The GSDS has been validated in cancer patients,[24].  
48  
49  
50

### 51 *2.3.8. Pain*

52  
53 The Brief-Pain Inventory (BPI),[34] was used to measure pain interference. The BPI is  
54  
55 a multidimensional questionnaire measuring pain intensity (four items), pain interference  
56  
57 (seven items), pain relief (one item), and pain location (body map). Only pain interference  
58  
59 was used in the present study. The seven interference items (general activity, normal work,  
60

walking ability, mood, relationships with other people, sleep, and enjoyment of life) were combined into a single interference item. The measurement scale ranges from 0 to 10, with higher scores indicating more pain interfering with daily living. The BPI has been validated in Norwegian cancer patients,[35].

#### 2.4. Ethics

The Regional Ethics Committee for the South-East 2010/1508, and the Institutional Review Boards (Personvernombudet) at each hospital approved the study. Each participant received written information about the study and signed informed consent.

#### 2.5. Statistical analyses

Descriptive statistics were used to describe the sociodemographic, clinical, and treatment characteristics of the patient sample. Differences between sexes were analyzed using a chi-squared test for categorical variables and an independent Student's *t* test for the continuous variables. One-way ANOVA was used to explore differences within groups on levels of pre- and postoperative fatigue. Patients with more than 20% of missing items on the LFS were excluded from analyses. The bivariate relationships between symptoms and fatigue at baseline were assessed using Pearson correlation analyses. Variables with significant correlation coefficients on bivariate analyses were included in a hierarchical linear analyses.

Two stepwise multivariate regression analyses were performed. In the first analysis, preoperative fatigue was the dependent variable. In the second analysis, postoperative fatigue was the dependent variable. In both analyses, age and sex were entered in step one. Clinical variables including comorbidities, FEV1, and FVC were entered in step two. Finally, the symptom variables of shortness of breath, cough, depression, anxiety, sleep disturbance, and pain interference were entered in step three. For the second regression analysis, the model

**Table 1**

Demographic, clinical, and treatment characteristics of the patients (N=196).

|                                    | Total | Men        | Women      | Statistics   | p-value      |
|------------------------------------|-------|------------|------------|--------------|--------------|
| <b>Sociodemographics</b>           |       |            |            |              |              |
| Age in years (mean, SD)            | 196   | 66.7 (8.2) | 64.1 (7.9) | t 2.28 (194) | <b>0.024</b> |
|                                    |       | % (n)      | % (n)      | $\chi$ (df)  |              |
| Cohabitation (living with someone) | 147   | 84.0 (89)  | (69.0) 58  | 5.95 (1)     | <b>0.015</b> |

also included a fourth step in which preoperative fatigue was included as an independent variable.

The entry of variables in different model steps was carried out according to theoretical and logical considerations. For all analyses,  $p < 0.05$  was considered statistically significant. Post hoc statistical power was calculated for hierarchical multiple regression: with an effect size ( $f^2$ ) for set B (five-month follow-up) at 0.15 (medium), [36], 11 predictors in set A and 12 in set B, a probability level of 0.05, and a sample size of 196, the observed power for the addition of set B was 0.95, [37]. Data were analyzed using SPSS (IBM Corporation, Armonk, NY, USA) version 24.0.

### 3. Results

#### 3.1. Sample characteristics

A total of 264 patients consented to participate in the study. Among these, 196 patients who answered the questionnaire both preoperatively and at five-month follow-up and had valid fatigue scores were included in the study. Sample characteristics are shown in Table 1. Most of the sample had adenocarcinoma stage 1A or 1B, received no preoperative treatment and had a lobectomy.

The mean preoperative fatigue scores were 2.49 (SD=2.02) for men and 2.47 (SD=1.96) for women. At the five-month follow-up, the postoperative fatigue scores were 3.0 (SD=2.1) for men and 2.9 (SD=2.1) for women. There were no significant differences in fatigue level preoperatively between those who completed or did not complete the postoperative fatigue scale.

|    |                                 |     |                    |                    |                    |                 |
|----|---------------------------------|-----|--------------------|--------------------|--------------------|-----------------|
| 1  |                                 |     |                    |                    |                    |                 |
| 2  |                                 |     |                    |                    |                    |                 |
| 3  | Work status                     |     |                    |                    |                    |                 |
| 4  | Full or part time               | 58  | 27.6 (29)          | 34.9 (29)          | .80 (2)            | 0.25            |
| 5  | Sick leave or disability        | 47  | 22.9 (24)          | 27.7 (23)          |                    |                 |
| 6  | Retired                         | 83  | 49.5 (52)          | 37.3 (31)          |                    |                 |
| 7  | Education                       |     |                    |                    |                    |                 |
| 8  | ≤12 years                       | 158 | 81.1(86)           | 86.7 (72)          | 1.07 (1)           | 0.30            |
| 9  | ≥13 years                       | 31  | 18.9 (20)          | 13.3 (11)          |                    |                 |
| 10 | <b>Clinical variables</b>       |     | Mean (SD)          | Mean (SD)          | t (df)             |                 |
| 11 | Comorbidities (SCQ)             | 193 | 3.72 (3.3)         | 4.67 (4.0)         | -1.74 (161.4)      | 0.08            |
| 12 | FEV1 (expected %)               | 190 | 76.7 (19.2)        | 80.4 (22.8)        | -1.20 (188)        | 0.23            |
| 13 | FVC (expected %)                | 183 | 91.2 (15.00)       | 102.4 (19.4)       | t -4.30(149.8)     | <b>&lt;.001</b> |
| 14 | Symptoms                        |     |                    |                    |                    |                 |
| 15 | Fatigue (LFS) baseline          | 196 | 2.50 (2.0)         | 2.48 (2.0)         | t -0.07 (194)      | 0.94            |
| 16 | Fatigue (LFS) 5-month follow-up | 196 | 3.0 (2.2)          | 2.9 (2.1)          | t 0.32 (194)       | 0.75            |
| 17 | Shortness of breath (EORTC)     | 194 | 2.24 (0.8)         | 2.00 (0.7)         | t -2.28 (192)      | <b>0.023</b>    |
| 18 | Cough (EORTC)                   | 193 | 1.96 (0.7)         | 1.98 (0.8)         | t -0.11 (191)      | 0.92            |
| 19 | Depression (CES-D)              | 190 | 10.49 (8.8)        | 12.92 (8.8)        | t -1.89 (188)      | 0.06            |
| 20 | Anxiety (STAI)                  | 192 | 51.22 (3.1)        | 50.80 (2.9)        | t 0.96 (190)       | 0.34            |
| 21 | Sleep disturbance (GSDS)        | 191 | 2.26 (1.05)        | 2.32 (1.00)        | t -0.36 (189)      | 0.72            |
| 22 | Pain (BPI) yes                  | 171 | % (n)<br>40.0 (38) | % (n)<br>51.3 (39) | χ (df)<br>2.18 (1) | p-value<br>0.14 |
| 23 | <b>Pathology and treatment</b>  |     |                    |                    |                    |                 |
| 24 | Tumor type                      |     |                    |                    |                    |                 |
| 25 | Adenocarcinoma                  | 106 | 45.0 (50)          | 65.9 (56)          | 24.00 (4)          | <b>&lt;.001</b> |
| 26 | Squamous cell                   | 66  | 45.0 (50)          | 12.9 (11)          |                    |                 |
| 27 | Small cell                      | 5   | 1.8 (2)            | 3.5 (3)            |                    |                 |
| 28 | Carcinoid                       | 6   | 1.8 (2)            | 4.7 (4)            |                    |                 |
| 29 | Other                           | 18  | 6.3 (7)            | 12.9 (11)          |                    |                 |
| 30 | Stage of cancer disease         |     |                    |                    |                    |                 |
| 31 | IA                              | 58  | 25.2 (27)          | 41.3 (31)          | 9.12 (4)           | 0.06            |
| 32 | IB                              | 59  | 35.5 (38)          | 28.0 (21)          |                    |                 |
| 33 | II                              | 35  | 24.3 (26)          | 12.0 (9)           |                    |                 |
| 34 | IIIA                            | 31  | 14.0 (15)          | 18.7 (14)          |                    |                 |
| 35 | IIIB-IV                         | 1   | 0.9 (1)            | -                  |                    |                 |
| 36 | Preoperative treatment          |     |                    |                    |                    |                 |
| 37 | None                            | 192 | 97.3 (108)         | 98.8 (84)          | 1.58 (3)           | 0.66            |
| 38 | Radiation                       | 1   | 0.9 (1)            | -                  |                    |                 |
| 39 | Chemotherapy                    | 1   | 0.9 (1)            | -                  |                    |                 |
| 40 | Combination                     | 2   | 0.9 (1)            | 1.2 (1)            |                    |                 |
| 41 | Type of surgery                 |     |                    |                    |                    |                 |
| 42 | Lobectomy                       | 133 | 67.6 (75)          | 68.2 (58)          | 1.26 (4)           | 0.87            |
| 43 | Bilobectomy                     | 15  | 6.3 (7)            | 9.4 (8)            |                    |                 |
| 44 | Pneumonectomy                   | 18  | 9.0 (10)           | 9.4 (8)            |                    |                 |
| 45 | Wedge resection                 | 18  | 9.9 (11)           | 8.2 (7)            |                    |                 |
| 46 | Thoracoscopic                   | 12  | 7.2 (8)            | 4.7 (4)            |                    |                 |
| 47 | Postoperative complications     |     |                    |                    |                    |                 |
| 48 | Reoperation                     | 9   | 3.6 (4)            | 5.9 (5)            | 0.57 (1)           | 0.45            |
| 49 | Pneumonia                       | 50  | 27 (30)            | 23.8 (20)          | 0.26 (1)           | 0.61            |
| 50 | Posttreatment                   |     |                    |                    |                    |                 |
| 51 | Radiation therapy               | 16  | 9.9 (11)           | 5.9 (5)            | 1.04 (1)           | 0.31            |
| 52 | Chemotherapy                    | 57  | 30.6 (34)          | 27.1 (23)          | 0.30 (1)           | 0.59            |
| 53 | Physiotherapy                   | 58  | 24.3 (26)          | 38.1 (32)          | 4.24 (1)           | <b>0.04</b>     |
| 54 | Rehabilitation                  | 24  | 7.5 (8)            | 19.3 (16)          | 5.90 (1)           | <b>0.015</b>    |

Abbreviations: SCQ, Self-administered Comorbidity Questionnaire; FEV1, forced expiratory volume in one second; FVC, Forced vital Capacity; EORTC, European Organization for Research and Treatment of Cancer; CES-D, Center for Epidemiologic Studies – Depression Scale; STAI, State-Trait Anxiety Inventory; GSDS, General Sleep Disturbance Scale; BPI, Brief Pain Inventory; LFS, Lee Fatigue Inventory.

Notes: Fatigue, range 0–10, higher score indicating greater fatigue severity; shortness of breath and cough range 1–4, higher score indicating more shortness of breath and cough; depression, range 0–60, higher score indicating more depression; pain, range 0–10, higher score indicating more pain; comorbidity, range 0–57, higher score indicating more comorbidity; anxiety, range 20–80, higher score indicating more anxiety; sleep disturbance, range 0–7, higher score indicating more severe sleep disturbance.

Bold numbers represent significant relationships.

### 3.2. Bivariate analyses

The bivariate analyses between the symptom variables are shown in Table 2. Medical and treatment characteristics including cancer stage, tumor type, type of surgery, and postoperative treatment such as radiation therapy, chemotherapy, physiotherapy, and rehabilitation were not significantly correlated with either preoperative or postoperative fatigue and, thus, were not included in the final model. Sociodemographic variables including work, education, and cohabitation were excluded before the final analyses for the same reason.

**Table 2**

Correlation matrix for symptoms at baseline, and fatigue baseline and 5-month follow-up (N=196).

|                                   | 1     | 2     | 3     | 4     | 5     | 6     | 7     | 8    | 9    | 10    | 11    | 12    | 13 |
|-----------------------------------|-------|-------|-------|-------|-------|-------|-------|------|------|-------|-------|-------|----|
| 1 Age                             | 1     |       |       |       |       |       |       |      |      |       |       |       |    |
| 2 Gender                          | -.16* | 1     |       |       |       |       |       |      |      |       |       |       |    |
| 3 FEV1                            | .06   | .09   | 1     |       |       |       |       |      |      |       |       |       |    |
| 4 FVC                             | .02   | .31*  | .65*  | 1     |       |       |       |      |      |       |       |       |    |
| 5 Fatigue (LFS) baseline          | -.23* | -.01  | -.19* | -.14  | 1     |       |       |      |      |       |       |       |    |
| 6 Fatigue (LFS) 5-month follow-up | -.16* | -.02  | -.22* | -.17* | .52*  | 1     |       |      |      |       |       |       |    |
| 7 Comorbidities (SCQ)             | .04   | .13   | -.23* | -.12  | .29*  | .31*  | 1     |      |      |       |       |       |    |
| 8 Shortness of breath (EORTC)     | -.03  | -.16* | -.25* | -.24* | .35*  | .62*  | .31*  | 1    |      |       |       |       |    |
| 9 Cough (EORTC)                   | -.04  | .01   | -.14  | -.15* | .33*  | .33*  | -.04  | .17* | 1    |       |       |       |    |
| 10 Depression (CES-D)             | -.15* | .14   | -.07  | -.03  | .47*  | .31*  | .17*  | .17* | .12  | 1     |       |       |    |
| 11 Anxiety (STAI)                 | .06   | -.07  | .08   | -.00  | -.24* | -.12  | -.08  | -.01 | -.1  | -.28* | 1     |       |    |
| 12 Sleep disturbance (GSDS)       | -.22* | .03   | -.09  | -.08  | .50*  | .41*  | .18*  | .26* | .14  | .57*  | -.22* | 1     |    |
| 13 Pain (BPI)                     | .1    | -.11  | .09   | .1    | -.25* | -.23* | -.18* | -.15 | -.02 | -.08  | .18*  | -.23* | 1  |

\* Correlation is significant at the 0.05 level (2-tailed).

Abbreviations: SCQ, Self-administered Comorbidity Questionnaire; FEV1, Forced expiratory volume in one second; FVC, Forced vital Capacity; EORTC, European Organization for Research and Treatment of Cancer; CES-D, Center for Epidemiologic Studies – Depression Scale; STAI, State-Trait Anxiety Inventory; GSDS, General Sleep Disturbance Scale; BPI, Brief Pain Inventory; LFS, Lee Fatigue Inventory.

### 3.3. Multivariate analyses

Hierarchical multiple regression analyses were used to assess the impact of the selected variables on levels of preoperative and postoperative fatigue (Table 3). Age, sex, and clinical variables were unrelated to preoperative fatigue.

**Table 3**

Results from the two hierarchical multivariate linear regression analyses with preoperative fatigue and postoperative fatigue (at 5-month follow-up) were used as dependent variables (N=196).

|                                      | Preoperative fatigue |              |                  | Postoperative fatigue |              |                  |
|--------------------------------------|----------------------|--------------|------------------|-----------------------|--------------|------------------|
|                                      | Beta                 | $\beta$      | p-value          | Beta                  | $\beta$      | p-value          |
| <b>Sociodemographics</b>             |                      |              |                  |                       |              |                  |
| Age                                  | -0.04                | -0.14        | 0.13             | -0.02                 | -0.07        | 0.26             |
| Gender                               | -0.39                | -0.10        | 0.16             | 0.03                  | 0.01         | 0.93             |
| Explained variance (R <sup>2</sup> ) |                      | <b>5.5%</b>  | <b>0.01</b>      |                       | 2.9%         | 0.10             |
| <b>Clinical variables</b>            |                      |              |                  |                       |              |                  |
| FEV1                                 | -0.00                | -0.05        | 0.63             | -0.00                 | -0.03        | 0.71             |
| FVC                                  | -0.01                | 0.04         | 0.61             | 0.00                  | 0.04         | 0.65             |
| Comorbidity                          | 0.10                 | 0.18         | 0.008            | 0.05                  | 0.08         | 0.19             |
| R <sup>2</sup> change                |                      | <b>10.6%</b> | <b>&lt;0.001</b> |                       | <b>12.1%</b> | <b>&lt;0.001</b> |
| Explained variance                   |                      | 16.1         |                  |                       | 15.0         |                  |
| <b>Fatigue at baseline</b>           |                      |              |                  |                       |              |                  |
| Fatigue                              |                      |              |                  | <b>0.18</b>           | <b>0.17</b>  | <b>0.03</b>      |
| R <sup>2</sup> change                |                      |              |                  |                       | <b>16.2%</b> | <b>&lt;0.001</b> |
| Explained variance                   |                      |              |                  |                       | 31.2%        |                  |
| <b>Other symptoms at baseline</b>    |                      |              |                  |                       |              |                  |
| Shortness of breath                  | 0.33                 | 0.13         | 0.06             | <b>1.27</b>           | <b>0.46</b>  | <b>&lt;0.001</b> |
| <b>Cough</b>                         | <b>0.64</b>          | <b>0.25</b>  | <b>&lt;0.001</b> | <b>0.50</b>           | <b>0.18</b>  | <b>0.004</b>     |
| Depression                           | <b>0.05</b>          | <b>0.23</b>  | <b>0.003</b>     | 0.01                  | 0.04         | 0.63             |
| Anxiety                              | -0.05                | -0.07        | 0.29             | 0.00                  | 0.00         | 0.95             |
| Sleep disturbance                    | <b>0.02</b>          | <b>0.20</b>  | <b>0.01</b>      | 0.01                  | 0.11         | 0.12             |
| Pain                                 | <b>0.44</b>          | <b>0.20</b>  | <b>0.01</b>      | -0.29                 | -0.07        | 0.26             |
| R <sup>2</sup> change                |                      | <b>30.5%</b> | <b>&lt;0.001</b> |                       | <b>23.2%</b> | <b>&lt;0.001</b> |
| Explained variance                   |                      | 46.6%        |                  |                       | 54.3%        |                  |

Abbreviations: FEV1, Forced expiratory volume in one second; FVC, Forced vital capacity.

Note: Bold numbers represent significant relationships.

1  
2  
3 At baseline, patients who reported pain scored higher on fatigue (M=2.9, SD=2.05)  
4 compared with patients who reported no pain (M=2.03, SD=1.8, t=3.28, p=0.001). Patients  
5 who reported pain at baseline also reported higher mean fatigue at five-month follow-up  
6 (M=3.54, SD=2.21) compared with those who reported no pain at baseline (M=2.55,  
7 SD=2.04, t=3.08, p=0.002). Among the reported symptoms, coughing, depression, sleep  
8 disturbance, and pain interference were related to preoperative fatigue after controlling for  
9 age, sex, clinical variables, and the other symptoms. The total model explained 46.6% of  
10 variance, while 30.5% was explained by the other symptoms.  
11  
12  
13  
14  
15  
16  
17  
18  
19  
20

21 At five-month follow-up, the only variables that predicted fatigue after controlling for  
22 age, sex, clinical variables, preoperative fatigue, and symptoms were shortness of breath and  
23 coughing. The total model explained 54.3% of variance, while 23.2% was explained by the  
24 other symptoms.  
25  
26  
27  
28  
29  
30

#### 31 **4. Discussion**

32 To our knowledge, this is the first study examining fatigue in surgically treated LC  
33 patients, including both preoperative data and data from five-month follow-up. Preoperative  
34 fatigue was significantly correlated with comorbidities and all the included symptoms in the  
35 bivariate analyses, while postoperative fatigue was significantly correlated with comorbidities  
36 and four out of six measured symptoms. However, shortness of breath was the only baseline  
37 variable that predicted postoperative fatigue.  
38  
39  
40  
41  
42  
43  
44  
45  
46  
47  
48

##### 49 *4.1. Relationship between postoperative fatigue level and preoperative symptoms*

50 Shortness of breath, coughing, depression, anxiety, sleep disturbance, and pain  
51 interference were significantly correlated with level of preoperative fatigue. Except for  
52 anxiety and pain interference, the same symptoms were associated with postoperative fatigue  
53 in the bivariate analyses at five-month follow-up. Before surgery, cough was significantly  
54  
55  
56  
57  
58  
59  
60

1  
2  
3 associated with fatigue, while shortness of breath was the symptom predictive of  
4  
5 postoperative fatigue. Shortness of breath is a prevalent and disturbing symptom in these  
6  
7 patients, which is physiologically based on disease location, damage caused by lung tumors,  
8  
9 and history of smoking. Shortness of breath requires intensive effort to breath, thus making  
10  
11 patients tired. The constant use of rib and respiratory muscles caused by shortness of breath  
12  
13 can exacerbate fatigue,[38]. These patients may benefit from prescribed bronchodilators and  
14  
15 non-pharmacological treatment such as physical activity. For some, it may be useful to learn  
16  
17 how to manage shortness of breath by controlled breathing techniques and practicing calming  
18  
19 techniques during shortness of breath episodes.  
20  
21  
22

23  
24 Consistent with previous research, we found that fatigue in LC patients undergoing  
25  
26 surgery is correlated with their symptoms and might cluster with other symptoms,[2,39].  
27  
28 Cheville et al.,[2] found a cluster of fatigue, cough, and dyspnea in LC survivors lasting for  
29  
30 eight years; however, in a later study, the same group found that the cluster did not predict  
31  
32 patient outcomes but that fatigue and dyspnea, alone and together, were sufficient to predict  
33  
34 important outcomes,[8].  
35  
36  
37

#### 38 39 *4.2. Relationship between fatigue and patients' disease characteristics and treatment*

40  
41 Although comorbidities did not predict postoperative fatigue in our analyses, there was  
42  
43 a bivariate relationship with fatigue both pre- and postoperatively. Others have also reported  
44  
45 correlations between comorbidity and fatigue,[6,12]. Respiratory comorbidities and cardiac  
46  
47 disease are especially related to fatigue in LC patients,[3,40]. We also found a correlation  
48  
49 between fatigue and spirometry results, with lower FEV1 and FVC related to higher levels of  
50  
51 fatigue at both measurement times. These variables were related to comorbidity and are an  
52  
53 important factor in identifying and screening patients at risk for developing fatigue. Poorer  
54  
55 respiratory test outcomes could indicate shortness of breath or respiratory comorbidities, such  
56  
57 as COPD, and may lead to distress and exhaustion and contribute to fatigue in these patients.  
58  
59  
60



1  
2  
3 Surgery type has been established as a predictor of fatigue in LC survivors and surgery  
4 has been associated with a greater symptom burden generally,[19]. In the present study,  
5  
6 treatment and disease variables did not correlate with postoperative fatigue at five-month  
7  
8 follow-up. These findings are inconsistent with other reports in which correlations have been  
9  
10 found between fatigue and chemotherapy,[9] and radiotherapy,[11]. However, our findings  
11  
12 are consistent with those from a general cancer population on the symptom cluster of pain,  
13  
14 fatigue, sleep disturbance, and depression. That group found that symptom experiences were  
15  
16 independent of demographic, disease, or treatment effects; their findings suggest that different  
17  
18 subgroups of patients may harbor different determinants (e.g., genetic) for experiencing  
19  
20 symptoms and suggested etiology that are independent of demographic, disease, or treatment  
21  
22 characteristics,[41].  
23  
24  
25  
26  
27  
28

#### 29 *4.3. Limitations*

30  
31  
32 Some study limitations need to be acknowledged. There was a five-month gap between  
33  
34 the two measurement points. During this time, other factors might have influenced patients'  
35  
36 fatigue experience. Surgery type might also be a predictor of patient fatigue,[19]. In this  
37  
38 study, only 6% of patients had video-assisted thoracoscopy; thus, it is not possible to  
39  
40 determine whether this influenced postoperative fatigue. Detailed information on symptom  
41  
42 management interventions such as physiotherapy and rehabilitation was not collected.  
43  
44 However, even if these variables had been included, no detailed information about the type  
45  
46 and length of these therapies was available.  
47  
48  
49  
50

#### 51 **5. Conclusions**

52  
53  
54 Based on the findings in the present study, patients should be screened for symptoms  
55  
56 before surgery and offered treatment for their symptoms to reduce pre- and postoperative  
57  
58 fatigue. Special attention should be given to treating patients' shortness of breath, since this is  
59  
60

1  
2  
3 a modifiable predictor for which treatments are available. Further research should pay specific  
4  
5 attention to the pair of symptoms of shortness of breath and fatigue, and to the effects on  
6  
7 fatigue and QOL when shortness of breath is treated.  
8  
9  
10  
11  
12  
13  
14  
15  
16  
17  
18  
19  
20  
21  
22  
23  
24  
25  
26  
27  
28  
29  
30  
31  
32  
33  
34  
35  
36  
37  
38  
39  
40  
41  
42  
43  
44  
45  
46  
47  
48  
49  
50  
51  
52  
53  
54  
55  
56  
57  
58  
59  
60

For peer review only

## Acknowledgements

We thank all of the patients who kindly participated and the nurses and physicians at Oslo University Hospital, St. Olav University Hospital, and Haukeland University Hospital who facilitated data collection.

## Footnotes

**Contributors:** TR and TO conceptualised the study. TO wrote the protocol manuscript and TR contributed to protocol development. TO had responsibility for data collection. TH and AL conducted the data analyses and drafted the initial report. TO and TR critically reviewed and edited the manuscript. All authors read and approved the final manuscript. Each author contributed to interpreting the analyses and to critically revising the article, and approved the final draft.

**Funding:** The study was funded by the Norwegian Cancer Association.

**Patient consent:** Not required.

**Ethics approval** The Regional Ethics Committee for the South-East 2010/1508, and the Institutional Review Boards (Personvernombudet) at each hospital approved the study. Each participant received written information about the study and signed informed consent.

**Competing interests:** None declared.

**Provenance and peer review** Not commissioned; externally peer reviewed.

## References

- 1 Krefregisteret 2017 [updated 09.05.2017]. Available from <https://www.krefregisteret.no/Registrene/Krefstatistikk/en/>
- 2 Cheville AL, Novotny PJ, Sloan JA et al. Fatigue, dyspnea, and cough comprise a persistent symptom cluster up to five years after diagnosis with lung cancer. *J Pain Symptom Manage* 2011;42:202–212. <https://doi.org/10.1016/j.jpainsymman.2010.10.257>.
- 3 Hung R, Krebs P, Coups EJ, et al. Fatigue and functional impairment in early-stage non-small cell lung cancer survivors. *J Pain Symptom Manage* 2011;41:426–435. <https://doi.org/10.1016/j.jpainsymman.2010.05.017>.
- 4 Portenoy RK, Itri LM. Cancer-related fatigue: guidelines for evaluation and Management. *Oncologist* 1991;4:1–10. DOI: 10.1097/01893697-200119020-00038 · S.
- 5 Lee KA, Hicks G, Nino-Murcia G, Validity and reliability of a scale to assess fatigue. *Psychiatry Res* 1990;36:291–298. [https://doi.org/10.1016/0165-1781\(91\)90027-M](https://doi.org/10.1016/0165-1781(91)90027-M).
- 6 Carnio S, Di Stefano RF, Novello S. Fatigue in lung cancer patients: symptom burden and management of challenges. *Lung Cancer (Auct)* 2016;7:73–82. doi: 0.2147/LCTT.S85334.
- 7 Sarna L, Padilla G, Holmes C, et al. Quality of life of long-term survivors of non-small-cell lung cancer. *J. Clin Oncol* 2002;20:2920–2929. <https://doi.org/10.1200/JCO.2002.09.045>.
- 8 Cheville AL, Novotny PJ, Sloan JA, et al. The value of a symptom cluster of fatigue, dyspnea, and cough in predicting clinical outcomes in lung cancer survivors. *J Pain Symptom Manag* 2011;42:213–221. <https://doi.org/10.1016/j.jpainsymman.2010.11.005>.
- 9 Long NH, Thanasilp S, Thato R. A causal model for fatigue in lung cancer patients receiving chemotherapy. *Eur J Oncol Nurs* 2016;21:242-247. <https://doi.org/10.1016/j.ejon.2015.10.010>.
- 10 Molassiotis A, Lowe M, Blackhall F, et al. A qualitative exploration of a respiratory distress symptom cluster in lung cancer: cough, breathlessness and fatigue. *Lung Cancer* 2011;71:94–102. <https://doi.org/10.1016/j.lungcan.2010.04.002>.
- 11 Ozturk A, Sarihan S, Ercan I, et al. Evaluating quality of life and pulmonary function of long-term survivors of non-small cell lung cancer treated with radical or postoperative radiotherapy. *Am J Clin Oncol* 2009;32:65-72. doi: 10.1097/COC.0b013e31817e6ec2.
- 12 Sarna L, Cooley ME, Brown JK, et al. Symptom severity 1 to 4 months after thoracotomy for lung cancer. *Am J of Crit Care* 2008;17:455-467.
- 13 Poghosyan H, Sheldon LK, Leveille SG, et al. Health-related quality of life after surgical treatment in patients with non-small cell lung cancer: a systematic review. *Lung Cancer* 2013;81:11-26. <https://doi.org/10.1016/j.lungcan.2013.03.013>.
- 14 Hoffman AJ, Given BA, von Eye A, et al. Relationships among pain, fatigue, insomnia, and gender in persons with lung cancer. *Oncol Nurs Forum* 2007;34:785. <http://ezproxy.diastud.no/docview/223105953?accountid=37793>.
- 15 Wright F, Melkus GDE, Hammer M, et al. Trajectories of evening fatigue in oncology

- 1  
2  
3 outpatients receiving chemotherapy. *J Pain Symptom Manag* 2015;50:163-175.  
4 <https://doi.org/10.1016/j.jpainsymman.2015.02.015>.  
5  
6 16 Wright F, Melkus GDE, Hammer M, et al. Predictors and trajectories of morning fatigue  
7 are distinct from evening fatigue. *J Pain Symptom Manag* 2015;50:176-189.  
8 <https://doi.org/10.1016/j.jpainsymman.2015.02.016>  
9  
10 17 Storey DJ, Waters RA, Hibberd CJ, et al. Clinically relevant fatigue in cancer outpatients:  
11 the Edinburgh Cancer Centre symptom study. *Ann Oncol* 2007;18:1861-1869.  
12 <https://doi.org/10.1093/annonc/mdm349>.  
13  
14 18 Huang X, Zhou W, Zhang Y. Features of fatigue inpatients with early-stage non-small  
15 cell lung cancer. *J Res Med Sci*; 2015;20:268–272.  
16  
17 19 Yang P, Chevillat AL, J.A. Wampfler JA, et al., Quality of life and symptom burden among  
18 long term lung cancer survivors: changing and adapting, *J Thorac Oncol* 2012;7:64–70.  
19 <https://doi.org/10.1097/JTO.0b013e3182397b3e>.  
20  
21 20 Oksholm T, Rustoen T, Cooper B, et al. Trajectories of symptom occurrence and severity  
22 from before through five months after lung cancer surgery. *J Pain Symptom Manag* 2015;  
23 49:995–1015. <https://doi.org/10.1016/j.jpainsymman.2014.11.297>.  
24  
25 21 Oksholm T, Miaskowski C, Solberg S, et al., Changes in symptom occurrence and  
26 severity before and after lung cancer surgery, *Cancer Nurs* 2015;38:351–357. doi:  
27 10.1097/NCC.000000000000198.  
28  
29 22 Oksholm T, Miaskowski C, J.S. Kongerud JS, et al. Does age influence the symptom  
30 experience of lung cancer patients prior to surgery? *Lung Cancer* 2013;82:156–161.  
31 <https://doi.org/10.1016/j.lungcan.2013.06.016>.  
32  
33 23 Sangha O, Stucki G, Liang MH, et al. The Self-Administered Comorbidity Questionnaire: a  
34 new method to assess comorbidity for clinical and health services research. *Arthrit Care Res*  
35 2003;49:156–163. <https://doi.org/10.1002/art.10993>.  
36  
37 24 Miaskowski C, Lee KA. Pain, fatigue, and sleep disturbances in oncology outpatients  
38 receiving radiation therapy for bone metastasis: a pilot study. *J Pain Symptom Manag*  
39 1999;17:320–332. [https://doi.org/10.1016/S0885-3924\(99\)00008-1](https://doi.org/10.1016/S0885-3924(99)00008-1).  
40  
41 25 Lerdal A, Kottorp A, Gay CL, et al. Lee Fatigue and Energy Scales: exploring  
42 aspects of validity in a sample of women with HIV using an application of a Rasch model,  
43 *Psychiatry Res* 2013;205;241–246. <https://doi.org/10.1016/j.psychres.2012.08.031>.  
44  
45 26 Bergman B, Aaronson N, Ahmedzai S, et al. The EORTC QLQ-LC13: a modular  
46 supplement to the EORTC core quality of life questionnaire (QLQ-C30) for use in  
47 lung cancer clinical trials. *Eur J Cancer* 1994;30:635–642. [https://doi.org/10.1016/0959-8049\(94\)90535-5](https://doi.org/10.1016/0959-8049(94)90535-5).  
48  
49 27 Giesinger JM, Kieffer JM, Fayers PM, et al. Replication and validation of higher order  
50 models demonstrated that a summary score for the EORTC QLQ-C30 is robust. *J Clin*  
51 *Epidemiol* 2016;69:79–88. <https://doi.org/10.1016/j.jclinepi.2015.08.007>.  
52  
53 28 Michelson H, Bolund C, Nilsson B, et al. Health-related quality of life  
54 measured by the EORTC QLQ-C30: reference values from a large sample of the Swedish  
55 population. *Acta Oncol* 2000;39:477–484. <https://doi.org/10.1080/028418600750013384>  
56  
57  
58  
59  
60

- 1  
2  
3 29 Radloff LS. The CES-D scale: a self-report depression scale for the general population,  
4 *Appl Psych Mea*. 1977;1:385–401. <https://doi.org/10.1177/014662167700100306>  
5
- 6 30 Sheehan JT, Fifield J, Reisine S, et al. The measurement structure of the Center  
7 for Epidemiologic Studies Depression Scale. *J Pers Assess* 1995;64:507-521.  
8 [https://doi.org/10.1207/s15327752jpa6403\\_9](https://doi.org/10.1207/s15327752jpa6403_9).  
9
- 10 31 Spielberger CD, Gorsuch RC, Lushene RE, et al. Manual for the  
11 State-Trait Anxiety Inventory (Form Y): Self-Evaluation Questionnaire. Consulting  
12 Psychologists Press, Palo Alto, CA, 1983.  
13
- 14 32 Cataldo JK, Brodsky JL. Lung cancer stigma, anxiety, depression and symptom  
15 Severity. *Oncology* 2013;85:33–40. <https://doi.org/10.1159/000350834>  
16
- 17 33 Lee KA. Self-reported sleep disturbances in employed women. *Sleep* 1992;15:493-  
18 498. <https://doi.org/10.1093/sleep/15.6.493>.  
19
- 20 34 Cleeland CS, Measurement and prevalence of pain in cancer. *Semiars in Onc Nurs*  
21 1985;1:87–92. [https://doi.org/10.1016/S0749-2081\(85\)80041-3](https://doi.org/10.1016/S0749-2081(85)80041-3).  
22
- 23 35 Klepstad P, Loge JH, Borchgrevink PC, et al. The Norwegian Brief Pain Inventory  
24 Questionnaire: translation and validation in cancer pain patients. *J Pain Symptom Manag*  
25 2002;24: 517–525. [https://doi.org/10.1016/S08853924\(02\)00526-2](https://doi.org/10.1016/S08853924(02)00526-2).  
26
- 27 36 Cohen J. A power primer: quantitative methods in psychology. *Psychological Bulletin*  
28 1992;112:155-159. doi:10.1037/0033-2909.112.1.155  
29
- 30 37 Soper DS. Post-hoc statistical power calculator for hierarchical multiple regression  
31 (Software) 2017. Available from: <http://www.danielsoper.com/statcalc/references.aspx?id=17>.  
32
- 33 38 Esper P, Heidrich D, Symptom clusters in advanced illness. *Seminars in Oncology*  
34 *Nursing* 2005;25:20–28. <https://doi.org/10.1053/j.soncn.2004.10.004>.  
35
- 36 39 Lin S, Chen Y, Yang L, et al. Pain, fatigue, disturbed sleep and distress comprised a  
37 symptom cluster that related to quality of life and functional status of lung cancer surgery  
38 patients. *J Clinical Nurs* 2013; 22.9-10:1281–1289. <https://doi.org/10.1111/jocn.12228>  
39
- 40 40 Yun YH, Kim YA, Min YH, et al., Health-related quality of life in disease-free survivors of  
41 surgically treated lung cancer compared with the general population, *Ann Surg*  
42 2012;255:1000–1007. doi: 10.1097/SLA.0b013e31824f1e9e.  
43
- 44 41 Miaskowski C, Cooper BA, Paul SM, et al. Subgroups of patients with cancer with  
45 different symptom experiences and quality-of-life outcomes: a cluster analysis. *Oncol Nurs*  
46 *Forum* 2006;33.  
47  
48  
49  
50  
51  
52  
53  
54  
55  
56  
57  
58  
59  
60

# Reporting checklist for case report or case series.

Based on the CARE guidelines.

## Instructions to authors

Complete this checklist by entering the page numbers from your manuscript where readers will find each of the items listed below.

Your article may not currently address all the items on the checklist. Please modify your text to include the missing information. If you are certain that an item does not apply, please write "n/a" and provide a short explanation.

Upload your completed checklist as an extra file when you submit to a journal.

In your methods section, say that you used the CARE reporting guidelines, and cite them as:

Gagnier JJ, Kienle G, Altman DG, Moher D, Sox H, Riley D; the CARE Group. The CARE Guidelines: Consensus-based Clinical Case Reporting Guideline Development

|              | Reporting Item                                                    | Page Number |
|--------------|-------------------------------------------------------------------|-------------|
|              | #1 The area of focus and "case report" should appear in the title | 1           |
|              | #2 Two to five key words that identify topics in this case report | 2           |
| Introduction | #3a What is unique and why is it important?                       | 2           |
|              | #3b The patient's main concerns and important clinical findings.  | 2           |
|              | #3c The main diagnoses, interventions, and outcomes.              | 2           |

|    |            |      |                                                                 |       |
|----|------------|------|-----------------------------------------------------------------|-------|
| 1  | Conclusion | #3d  | What are one or more “take-away” lessons?                       | 2     |
| 2  |            |      |                                                                 |       |
| 3  |            |      |                                                                 |       |
| 4  |            | #4   | Briefly summarize why this case is unique with medical          | 3,4   |
| 5  |            |      | literature references.                                          |       |
| 6  |            |      |                                                                 |       |
| 7  |            |      |                                                                 |       |
| 8  |            |      |                                                                 |       |
| 9  |            |      |                                                                 |       |
| 10 |            | #5a  | De-identified demographic and other patient information.        | 5     |
| 11 |            |      |                                                                 |       |
| 12 |            |      |                                                                 |       |
| 13 |            | #5b  | Main concerns and symptoms of the patient.                      | 6,7   |
| 14 |            |      |                                                                 |       |
| 15 |            |      |                                                                 |       |
| 16 |            | #5c  | Medical, family, and psychosocial history including genetic     | 5,6   |
| 17 |            |      | information.                                                    |       |
| 18 |            |      |                                                                 |       |
| 19 |            |      |                                                                 |       |
| 20 |            |      |                                                                 |       |
| 21 |            | #5d  | Relevant past interventions and their outcomes.                 | 5     |
| 22 |            |      |                                                                 |       |
| 23 |            |      |                                                                 |       |
| 24 |            | #6   | Relevant physical examination (PE) and other clinical findings. | 10    |
| 25 |            |      |                                                                 |       |
| 26 |            |      |                                                                 |       |
| 27 |            |      |                                                                 |       |
| 28 |            | #7   | Relevant data from this episode of care organized as a timeline | 115   |
| 29 |            |      | (figure or table).                                              |       |
| 30 |            |      |                                                                 |       |
| 31 |            |      |                                                                 |       |
| 32 |            |      |                                                                 |       |
| 33 |            | #8a  | Diagnostic methods (PE, laboratory testing, imaging, surveys).  | 5     |
| 34 |            |      |                                                                 |       |
| 35 |            |      |                                                                 |       |
| 36 |            | #8b  | Diagnostic challenges.                                          | 5     |
| 37 |            |      |                                                                 |       |
| 38 |            |      |                                                                 |       |
| 39 |            | #8c  | Diagnostic reasoning including differential diagnosis           | 5     |
| 40 |            |      |                                                                 |       |
| 41 |            |      |                                                                 |       |
| 42 |            | #8d  | Prognostic characteristics when applicable                      | 5     |
| 43 |            |      |                                                                 |       |
| 44 |            |      |                                                                 |       |
| 45 |            | #9a  | Types of intervention (pharmacologic, surgical, preventive).    | 5     |
| 46 |            |      |                                                                 |       |
| 47 |            |      |                                                                 |       |
| 48 |            | #9b  | Administration of intervention (dosage, strength, duration)     | 5     |
| 49 |            |      |                                                                 |       |
| 50 |            |      |                                                                 |       |
| 51 |            | #9c  | Changes in the interventions with explanations.                 | 5     |
| 52 |            |      |                                                                 |       |
| 53 |            |      |                                                                 |       |
| 54 |            | #10a | Clinician and patient-assessed outcomes when appropriate        | 11,12 |
| 55 |            |      |                                                                 |       |
| 56 |            |      |                                                                 |       |
| 57 |            | #10b | Important follow-up diagnostic and other test results.          | 11,12 |
| 58 |            |      |                                                                 |       |
| 59 |            |      |                                                                 |       |
| 60 |            |      |                                                                 |       |



|    |      |                                                          |       |
|----|------|----------------------------------------------------------|-------|
| 1  | #10c | Intervention adherence and tolerability (how was this    | 12    |
| 2  |      | assessed)?                                               |       |
| 3  |      |                                                          |       |
| 4  |      |                                                          |       |
| 5  |      |                                                          |       |
| 6  | #10d | Adverse and unanticipated events.                        | 11    |
| 7  |      |                                                          |       |
| 8  |      |                                                          |       |
| 9  |      |                                                          |       |
| 10 | #11a | Strengths and limitations in your approach to this case. | 3     |
| 11 |      |                                                          |       |
| 12 |      |                                                          |       |
| 13 | #11b | Discussion of the relevant medical literature.           | 13,14 |
| 14 |      |                                                          |       |
| 15 |      |                                                          |       |
| 16 | #11c | The rationale for your conclusions.                      | 13,14 |
| 17 |      |                                                          |       |
| 18 |      |                                                          |       |
| 19 | #11d | The primary “take-away” lessons from this case report.   | 14,15 |
| 20 |      |                                                          |       |
| 21 |      |                                                          |       |
| 22 | #12  | The patient can share their perspective on their case    | 12,13 |
| 23 |      |                                                          |       |
| 24 |      |                                                          |       |
| 25 | #13  | The patient should give informed consent.                | 8     |
| 26 |      |                                                          |       |
| 27 |      |                                                          |       |

28 The CARE checklist is distributed under the terms of the Creative Commons Attribution License CC-  
29 BY-NC. This checklist was completed on 26. November 2018 using <http://www.goodreports.org/>, a  
30 tool made by the [EQUATOR Network](#) in collaboration with [Penelope.ai](#)  
31  
32  
33  
34  
35  
36  
37  
38  
39  
40  
41  
42  
43  
44  
45  
46  
47  
48  
49  
50  
51  
52  
53  
54  
55  
56  
57  
58  
59  
60

# BMJ Open

## Predicting postoperative fatigue in surgically treated lung cancer patients – a longitudinal five-month follow-up study.

|                                 |                                                                                                                                                                                                                                                                                                                                                                                                                                                                                                                                                                    |
|---------------------------------|--------------------------------------------------------------------------------------------------------------------------------------------------------------------------------------------------------------------------------------------------------------------------------------------------------------------------------------------------------------------------------------------------------------------------------------------------------------------------------------------------------------------------------------------------------------------|
| Journal:                        | <i>BMJ Open</i>                                                                                                                                                                                                                                                                                                                                                                                                                                                                                                                                                    |
| Manuscript ID                   | bmjopen-2018-028192.R1                                                                                                                                                                                                                                                                                                                                                                                                                                                                                                                                             |
| Article Type:                   | Original research                                                                                                                                                                                                                                                                                                                                                                                                                                                                                                                                                  |
| Date Submitted by the Author:   | 01-Jun-2019                                                                                                                                                                                                                                                                                                                                                                                                                                                                                                                                                        |
| Complete List of Authors:       | Hugoy, Therese ; University of Oslo, Institute of Health and Society, Faculty of Medicine, ; Lovisenberg Diakonale Hogskole Lerdal, Anners; University of Oslo, Dept. of Nursing Science; Lovisenberg Diakonale Hospital, Dept. of Research<br>Rustoen, Tone; University of Oslo, Norway, Institute of Health and Society, Faculty of Medicine; Oslo universitetssykehus Ulleval, Department of Research and Development, Division of Emergencies and Critical Care<br>Oksholm, Trine; VID Vitenskapelige Hogskole, Faculty of Health Studies, Campus Haraldsplass |
| <b>Primary Subject Heading</b>: | Nursing                                                                                                                                                                                                                                                                                                                                                                                                                                                                                                                                                            |
| Secondary Subject Heading:      | Oncology, Surgery                                                                                                                                                                                                                                                                                                                                                                                                                                                                                                                                                  |
| Keywords:                       | Fatigue, Lung Cancer, Neoplasm, Quality of Life, SURGERY                                                                                                                                                                                                                                                                                                                                                                                                                                                                                                           |
|                                 |                                                                                                                                                                                                                                                                                                                                                                                                                                                                                                                                                                    |

SCHOLARONE™  
Manuscripts

1  
2  
3 **Predicting postoperative fatigue in surgically treated lung cancer patients – a**  
4 **longitudinal five-month follow-up study.**  
5  
6

7 Therese Hugøy<sup>a,b,c</sup>, Anners Lerdal<sup>a,d</sup> Tone Rustøen<sup>a,e</sup>, Trine Oksholm<sup>f</sup>  
8  
9

10  
11 <sup>a</sup>Department of Nursing Science, Institute of Health and Society, Faculty of Medicine,  
12 University of Oslo, Norway.  
13

14 <sup>b</sup>Centre for Patient centered heart- and lung research. Department of cardiothoracic surgery.  
15 Division of Cardiovascular and Pulmonary Diseases. Oslo University Hospital, Oslo, Norway.  
16 (T.H.)  
17

18  
19 <sup>c</sup>Lovisenberg Diaconal University College, Lovisenberggt. 15B, 0456 Oslo  
20

21 <sup>d</sup>Department for Patient Safety and Research, Lovisenberg Diaconal Hospital, P.O. Box 4970  
22 Nydalen, 0440 Oslo, Norway  
23

24  
25 <sup>e</sup> Department of Research and Development, Division of Emergencies and Critical Care, Oslo  
26 University Hospital, P.O. Box 4956 Nydalen, 0424 Oslo, Norway;  
27

28 <sup>f</sup> VID Specialized University, Faculty of Health Studies, Campus Haraldsplass, P.O. Box 184  
29 Vinderen, 0319 Oslo, Norway  
30  
31

32  
33  
34 \*Corresponding author at:  
35 Trine Oksholm  
36 trine.oksholm@vid.no  
37  
38  
39  
40  
41

42 Word count: 3275  
43  
44  
45  
46  
47  
48  
49  
50  
51  
52  
53  
54  
55  
56  
57  
58  
59  
60

## ABSTRACT

*Objectives:* Despite the negative influence of fatigue on quality of life in patients who undergo lung cancer surgery, little is known about the possible predictors of postoperative fatigue. The aim of this study was to examine demographic and clinical characteristics that might predict postoperative fatigue five months after lung cancer surgery.

*Design:* A prospective longitudinal follow up study comprising pre- and postoperative questionnaires, including Lee Fatigue Scale, and sociodemographic and clinical data.

*Setting:* Three university hospitals in Norway (e.g., Oslo University Hospital, St. Olav University Hospital, Haukeland University Hospital).

*Participants:* In total, 196 surgically treated patients who answered the questionnaires both preoperatively and at five-month follow-up with valid fatigue scores.

*Results:* Bivariate analyses showed that preoperative fatigue was associated with comorbidities and the symptoms of shortness of breath, cough, depression, anxiety, sleep disturbance, and pain. Only cough was directly associated with preoperative fatigue in a regression model. Comorbidities and the symptoms of shortness of breath, cough, depression, and sleep disturbance were associated with postoperative fatigue in the bivariate analyses, but only shortness of breath was associated with postoperative fatigue in the regression model. We did not find any significant correlations between fatigue and any treatment variable.

*Conclusion:* Clinicians should pay special attention to lung symptoms and be aware that these may lead to long-term postoperative fatigue. Further research should examine whether interventions reducing lung symptoms, such as shortness of breath and coughing, may prevent development of fatigue in patients undergoing lung cancer surgery.

*Key words:* Fatigue, Lung Cancer, Neoplasm, Quality of Life, Surgery

### Strengths and limitations of this study

- Fatigue is a symptom that has a great impact on patients quality of life and this topic is relevant both to patients and healthcare providers
- A rather large sample of surgically treated lung cancer patients were included in the study patients', fatigue was measured both preoperatively and after surgery. This gives information about fatigue after lung cancer surgery.
- There was a five-month gap between the two measurement points. During this time, other factors might have influenced patients' fatigue experience.
- There were limited information on symptom management interventions such as physiotherapy and rehabilitation

### 1. Introduction

Lung cancer (LC) is presently one of the most common malignancies, and it is estimated that 20% of cancer-related deaths are caused by LC.[1] Only 20% of patients diagnosed with non-small-cell lung cancer meet the criteria for surgery due to their late stage at diagnosis; for these patients, surgery may be curative.[2] In Norway during 2014, five-year LC survival was generally 19% in women and 13% in men.[1] In surgically treated patients, the five-year survival ranges from 50% to 70%, depending on the tumor stage at surgery.

Fatigue is common among cancer patients. An estimated 75–90% of patients with LC report fatigue after cancer treatment.[3,4] Fatigue has been described as a complex, multidimensional symptom and has been defined as a sense of exhaustion, lack of energy, or tiredness distinct from sleepiness, sadness, or weakness.[5] Cancer-related fatigue is related to cancer or its treatment, and interferes with usual functioning.[3] Fatigue has a negative impact on patients' health-related quality of life (HRQOL),[6] their ability to receive treatment, and their long-term prognosis. Although there are limited data on LC and fatigue in patients who have undergone surgery, it has been shown that fatigue has a negative impact on HRQOL in

1  
2  
3 LC survivors.[7] One study showed that fatigue was a significant predictor of survival at each  
4  
5 time point assessed.[8] In another study on symptom severity after thoracotomy, fatigue was  
6  
7 reported as the most common and severe symptom at every time point.[7]  
8  
9

10 Several studies have reported interrelations between fatigue, cough, and dyspnea.[8–11]  
11  
12 Fatigue is also strongly related to symptoms of depression and anxiety.[12,13] Associations  
13  
14 between fatigue and sex, pain, insomnia, and dyspnea have also been reported.[12,14] Studies  
15  
16 on fatigue in populations with lung cancer in different stages have also shown strong  
17  
18 correlations between fatigue and sleep disturbance.[6,15–17] Sarna et al.,[12] found that  
19  
20 symptom severity in surgical patients was related to the extent of their comorbid condition.  
21  
22 Other studies of patients with LC have also shown correlations between comorbidities and  
23  
24 fatigue,[6] as well as strong correlations between pulmonary diseases such as COPD and  
25  
26 asthma, and fatigue.[3,18] Studies of fatigue in the general population has shown a higher  
27  
28 proportion of severe fatigue cases among women than among men.[19,20] Thus, examining  
29  
30 differences in fatigue in relation to sex among LC patients is of interest. Fatigue has a  
31  
32 negative impact on both patients with LC and survivors in general;[21] however, to our  
33  
34 knowledge, there have been no studies to date specifically investigating fatigue in surgically  
35  
36 treated patients with LC.  
37  
38  
39  
40  
41

42 Thus, our aim was to examine the relationships between fatigue and disease  
43  
44 characteristics, treatment, and other symptoms. We hypothesized that fatigue levels at five-  
45  
46 month follow-up would be significantly related to: (1) sex, (2) clinical variables (preoperative  
47  
48 comorbidities, forced expiratory volume in one second [FEV1], and forced vital capacity  
49  
50 [FVC]); (3) preoperative symptoms (shortness of breath, coughing, depression, anxiety, pain,  
51  
52 and sleep disturbance); and (4) treatment and medical variables (surgery type, cancer stage,  
53  
54 and adjuvant therapy).  
55  
56  
57  
58  
59

## 60 **2. Material and methods**

1  
2  
3 This study is part of a larger, longitudinal investigation of symptoms in patients with LC  
4 who were eligible for surgery,[22–24] for which data were collected prior to surgery and  
5 prospectively at four time points up to one year after surgery. Here, we analyzed the data  
6 collected prior to surgery and at the five-month follow-up to gain insight into patients'  
7 experiences with fatigue before surgery and after the immediate postoperative period.  
8  
9  
10  
11  
12  
13  
14

### 15 16 *2.1. Patients and settings*

17  
18 Patients were included if they were 18 years or older, scheduled for primary LC surgery,  
19 and could understand, read, and write Norwegian. Patients with a benign or metastatic  
20 disease, whose surgery was canceled, or who had cognitive impairment, were excluded. We  
21 recruited patients from three university hospitals in Norway: Oslo University Hospital, St.  
22 Olav University Hospital, and Haukeland University Hospital. The recruitment started in  
23 November 2010 and was completed in March 2012.  
24  
25  
26  
27  
28  
29  
30  
31  
32  
33

### 34 35 *2.2 Patient and Public Involvement*

36  
37 The study was funded Norwegian Cancer Society (NCS). The study was discussed with  
38 representatives from the Lung Cancer subgroup before the study started and an article about  
39 the main result from the study is published in the membership journal for patients with lung  
40 cancer.  
41  
42  
43  
44  
45  
46

### 47 48 *2.3. Study procedures*

49  
50 Hospital research staff approached patients and explained the study purpose: 91% of the  
51 participants were recruited in the hospital 1–3 days before surgery, and the remainder in  
52 outpatient clinics prior to surgery. Patients signed a written informed consent before they  
53 completed several self-report questionnaires with information on sociodemographic and  
54 clinical characteristics, and symptoms both prior to surgery and at a five-month follow-up.  
55  
56  
57  
58  
59  
60

1  
2  
3 Permission to use the questionnaire was obtained from the copyright detectors before study  
4 start. Data on type of tumor, cancer stage, surgery type, and lung function were collected from  
5 the patients' medical records. FEV1 and FVC were measured preoperatively using a  
6 spirometer. Five months after surgery, patients received questionnaires by regular mail, along  
7 with a postage-paid return envelope.  
8  
9

## 10 11 12 13 14 15 16 *2.4. Instruments and assessment*

### 17 18 19 *2.4.1. Sociodemographic, clinical, symptom, and fatigue characteristics*

20  
21 Patients provided information on their sex, marital status, living situation, level of  
22 education, and employment status. Information on age, smoking status, FEV1, tumor  
23 histology, cancer stage, type of surgery, pre- and postoperative treatment, postoperative  
24 complications, and TNM classification were collected from patients' medical records; the  
25 TNM classification is a system for cancer staging based on tumor (T), node (N), and  
26 metastasis (M).  
27  
28  
29  
30  
31  
32  
33  
34

### 35 36 *2.4.2. Comorbidities*

37  
38 Comorbidities were measured using the Self-administered Comorbidity Questionnaire-  
39 19 (SCQ-19),[25] on which scores can range from 0 to 57, with a higher score indicating a  
40 more severe comorbidity profile. The SCQ includes 16 comorbidities and three optional  
41 conditions. Patients indicated whether or not they had the comorbid condition (yes/no); if they  
42 had the condition they were asked if they received treatment for it; and finally if it limited  
43 their activities. The SCQ-19 has well-established validity and reliability and has been used to  
44 assess comorbidity in Norwegian oncology patients.[25] Only the number of comorbidities  
45 was used in the present study.  
46  
47  
48  
49  
50  
51  
52  
53  
54

### 55 56 57 58 59 60 *2.4.3. Fatigue*



1  
2  
3 The Lee Fatigue Scale (LFS),[5] was used to measure fatigue at baseline and five-month  
4 follow-up. The LFS consists of 18 items designed to assess fatigue (13 items) and energy (5  
5 items). We used only the 13 fatigue items in this study. Patients were asked to rate each item  
6 on a 0–10 scale, with a higher score indicating greater fatigue severity. A fatigue score was  
7 calculated using the mean of the 13 items at each measurement. The LFS has well-established  
8 validity and reliability.[26,27] Fatigue scores at baseline were defined as preoperative fatigue  
9 and at five-month follow-up as postoperative fatigue.

#### 2.4.4. *Shortness of breath and cough*

21 The European Organization for Research and Treatment of Cancer Quality-of-Life  
22 Questionnaire – Lung Cancer Module (EORTC QLQ-LC13),[28] was used to measure  
23 shortness of breath and cough. Patients were asked to rate their severity on each shortness of  
24 breath and cough item using a four-point Likert scale where 1 = not at all; 2 = a little; 3 =  
25 quite a bit; and 4 = very much. The EORTC QLQ-LC13 has been validated in Norwegian LC  
26 patients.[29,30]

#### 2.4.5. *Depression*

36 The Center for Epidemiologic Studies – Depression Scale (CES-D),[31] was used to  
37 measure depression symptoms. The scale has 20 items related to depression and patients were  
38 asked to report how they felt during the past week. Each item was rated on a four-point Likert  
39 scale and scores ranged from 0 to 60, with a higher score indicating a higher level of  
40 depression. A total depression score was calculated as the mean of all the sub scores.  
41 Acceptable reliability and validity have been reported in a previous study.[32]

#### 2.4.6. *Anxiety*

54 The State-Trait Anxiety Inventory (STAI, Y-2),[33] was used to measure anxiety. The  
55 STAI includes 20 items related to anxiety rated on a four-point Likert scale. Scores range  
56  
57  
58  
59  
60

1  
2  
3 from 20 to 80, with a higher score indicating a higher level of anxiety. The STAI has been  
4  
5 validated in patients with LC.[34]  
6  
7

#### 8 *2.4.7. Sleep disturbance*

10 The General Sleep Disturbance Scale (GSDS),[35] was used to measure sleep  
11  
12 disturbance. The GSDS consists of 21 items related to sleep disturbance. Each item is rated on  
13  
14 a numeric rating scale ranging from 0 (never) to 7 (every day). A sleep disturbance score was  
15  
16 calculated from the mean of all scale items. Higher scores indicate more severe sleep  
17  
18 disturbance. The GSDS has been validated in cancer patients.[26]  
19  
20  
21

#### 22 *2.4.8. Pain*

24 The Brief-Pain Inventory (BPI),[36] was used to measure pain interference. The BPI is  
25  
26 a multidimensional questionnaire measuring pain intensity (four items), pain interference  
27  
28 (seven items), pain relief (one item), and pain location (body map). Only pain interference  
29  
30 was used in the present study. The seven interference items (general activity, normal work,  
31  
32 walking ability, mood, relationships with other people, sleep, and enjoyment of life) were  
33  
34 combined into a single interference item. The measurement scale ranges from 0 to 10, with  
35  
36 higher scores indicating more pain interfering with daily living. The BPI has been validated in  
37  
38 Norwegian cancer patients.[37]  
39  
40  
41  
42  
43

#### 44 *2.5. Ethics*

46 The Regional Ethics Committee for the South-East 2010/1508, and the Institutional Review  
47  
48 Boards (Personvernombudet) at each hospital approved the study. Each participant received  
49  
50 written information about the study and signed informed consent. The article complies with  
51  
52 the STROBE guidelines.[38]  
53  
54  
55  
56

#### 57 *2.6. Statistical analyses*

1  
2  
3 Descriptive statistics were used to describe the sociodemographic, clinical, and  
4 treatment characteristics of the patient sample. Differences between sexes were analyzed  
5 using a chi-squared test for categorical variables and an independent Student's *t* test for the  
6 continuous variables. One-way ANOVA was used to explore differences within groups on  
7 levels of pre- and postoperative fatigue. Patients with more than 20% of missing items on the  
8 LFS were excluded from analyses. If the scales had less than 20% missing, the score were  
9 calculated from the mean of the particular patient's valid scores. The bivariate relationships  
10 between symptoms and fatigue at baseline were assessed using Pearson correlation analyses.  
11 Variables with significant correlation coefficients on bivariate analyses were included in a  
12 hierarchical linear analyses.  
13  
14  
15  
16  
17  
18  
19  
20  
21  
22  
23  
24  
25

26 Two stepwise multivariate regression analyses were performed. In the first analysis,  
27 preoperative fatigue was the dependent variable. In the second analysis, postoperative fatigue  
28 was the dependent variable. In both analyses, age and sex were entered in step one. Clinical  
29 variables including comorbidities, FEV1, and FVC were entered in step two. Finally, the  
30 symptom variables of shortness of breath, cough, depression, anxiety, sleep disturbance, and  
31 pain interference were entered in step three. For the second regression analysis, the model  
32 also included a fourth step in which preoperative fatigue was included as an independent  
33 variable.  
34  
35  
36  
37  
38  
39  
40  
41  
42  
43  
44

45 The entry of variables in different model steps was carried out according to theoretical  
46 and logical considerations. For all analyses,  $p < 0.05$  was considered statistically significant.  
47 Post hoc statistical power was calculated for hierarchical multiple regression: with an effect  
48 size ( $f^2$ ) for set B (five-month follow-up) at 0.15 (medium), [39] 11 predictors in set A and 12  
49 in set B, a probability level of 0.05, and a sample size of 196, the observed power for the  
50 addition of set B was 0.95. [40] Data were analyzed using SPSS (IBM Corporation, Armonk,  
51 NY, USA) version 24.0.  
52  
53  
54  
55  
56  
57  
58  
59  
60

**Table 1**

Demographic, clinical, and treatment characteristics of the patients (N=196).

|                                    | Total | Men          | Women        | Statistics     | p-value         |
|------------------------------------|-------|--------------|--------------|----------------|-----------------|
| <b>Sociodemographics</b>           |       |              |              |                |                 |
| Age in years (mean, SD)            | 196   | 66.7 (8.2)   | 64.1 (7.9)   | t 2.28 (194)   | <b>0.024</b>    |
|                                    |       | % (n)        | % (n)        | $\chi$ (df)    |                 |
| Cohabitation (living with someone) | 147   | 84.0 (89)    | (69.0) 58    | 5.95 (1)       | <b>0.015</b>    |
| Work status                        |       |              |              |                |                 |
| Full or part time                  | 58    | 27.6 (29)    | 34.9 (29)    | .80 (2)        | 0.25            |
| Sick leave or disability           | 47    | 22.9 (24)    | 27.7 (23)    |                |                 |
| Retired                            | 83    | 49.5 (52)    | 37.3 (31)    |                |                 |
| Education                          |       |              |              |                |                 |
| ≤12 years                          | 158   | 81.1(86)     | 86.7 (72)    | 1.07 (1)       | 0.30            |
| ≥13 years                          | 31    | 18.9 (20)    | 13.3 (11)    |                |                 |
| <b>Clinical variables</b>          |       |              |              |                |                 |
|                                    |       | Mean (SD)    | Mean (SD)    | t (df)         |                 |
| Comorbidities (SCQ)                | 193   | 3.72 (3.3)   | 4.67 (4.0)   | -1.74 (161.4)  | 0.08            |
| FEV1 (expected %)                  | 190   | 76.7 (19.2)  | 80.4 (22.8)  | -1.20 (188)    | 0.23            |
| FVC (expected %)                   | 183   | 91.2 (15.00) | 102.4 (19.4) | t -4.30(149.8) | <b>&lt;.001</b> |

### 3. Results

#### 3.1. Sample characteristics

Statisticians calculated that 300 should be included in the study to ensure sufficient strength. Totally, 375 patients with presumptive primary lung cancer were asked to participate in the study and 307 agreed to participate (Fig 1). Among these, 196 patients who answered the questionnaire both preoperatively and at five-month follow-up and had valid fatigue scores at both measurement points were included in the study. Sample characteristics are shown in Table 1. Although women were younger, more women lived alone, reported higher FVC, less shortness of breath and had a higher proportion of adenocarcinoma cancer type, and was more active in physiotherapy and rehabilitation than men, their level of fatigue did not differ. Most of the sample had adenocarcinoma stage 1A or 1B, received no preoperative treatment and had a lobectomy.

The mean preoperative fatigue scores were 2.49 (SD=2.02) for men and 2.47 (SD=1.96) for women. At the five-month follow-up, the postoperative fatigue scores were 3.0 (SD=2.1) for men and 2.9 (SD=2.1) for women. There were no significant differences in fatigue level preoperatively between those who completed or did not complete the postoperative fatigue scale.

|                                 |     |             |             |               |                 |  |
|---------------------------------|-----|-------------|-------------|---------------|-----------------|--|
| Symptoms                        |     |             |             |               |                 |  |
| Fatigue (LFS) baseline          | 196 | 2.50 (2.0)  | 2.48 (2.0)  | t -0.07 (194) | 0.94            |  |
| Fatigue (LFS) 5-month follow-up | 196 | 3.0 (2.2)   | 2.9 (2.1)   | t 0.32 (194)  | 0.75            |  |
| Shortness of breath (EORTC)     | 194 | 2.24 (0.8)  | 2.00 (0.7)  | t -2.28 (192) | <b>0.023</b>    |  |
| Cough (EORTC)                   | 193 | 1.96 (0.7)  | 1.98 (0.8)  | t -0.11 (191) | 0.92            |  |
| Depression (CES-D)              | 190 | 10.49 (8.8) | 12.92 (8.8) | t -1.89 (188) | 0.06            |  |
| Anxiety (STAI)                  | 192 | 51.22 (3.1) | 50.80 (2.9) | t 0.96 (190)  | 0.34            |  |
| Sleep disturbance (GSDS)        | 191 | 2.26 (1.05) | 2.32 (1.00) | t -0.36 (189) | 0.72            |  |
|                                 |     | % (n)       | % (n)       | $\chi$ (df)   | p-value         |  |
| Pain (BPI) yes                  | 171 | 40.0 (38)   | 51.3 (39)   | 2.18 (1)      | 0.14            |  |
| <b>Pathology and treatment</b>  |     |             |             |               |                 |  |
| Tumor type                      |     |             |             |               |                 |  |
| Adenocarcinoma                  | 106 | 45.0 (50)   | 65.9 (56)   | 24.00 (4)     | <b>&lt;.001</b> |  |
| Squamous cell                   | 66  | 45.0 (50)   | 12.9 (11)   |               |                 |  |
| Small cell                      | 5   | 1.8 (2)     | 3.5 (3)     |               |                 |  |
| Carcinoid                       | 6   | 1.8 (2)     | 4.7 (4)     |               |                 |  |
| Other                           | 18  | 6.3 (7)     | 12.9 (11)   |               |                 |  |
| Stage of cancer disease         |     |             |             |               |                 |  |
| IA                              | 58  | 25.2 (27)   | 41.3 (31)   | 9.12 (4)      | 0.06            |  |
| IB                              | 59  | 35.5 (38)   | 28.0 (21)   |               |                 |  |
| II                              | 35  | 24.3 (26)   | 12.0 (9)    |               |                 |  |
| IIIA                            | 31  | 14.0 (15)   | 18.7 (14)   |               |                 |  |
| IIIB-IV                         | 1   | 0.9 (1)     | -           |               |                 |  |
| Preoperative treatment          |     |             |             |               |                 |  |
| None                            | 192 | 97.3 (108)  | 98.8 (84)   | 1.58 (3)      | 0.66            |  |
| Radiation                       | 1   | 0.9 (1)     | -           |               |                 |  |
| Chemotherapy                    | 1   | 0.9 (1)     | -           |               |                 |  |
| Combination                     | 2   | 0.9 (1)     | 1.2 (1)     |               |                 |  |
| Type of surgery                 |     |             |             |               |                 |  |
| Lobectomy                       | 133 | 67.6 (75)   | 68.2 (58)   | 1.26 (4)      | 0.87            |  |
| Bilobectomy                     | 15  | 6.3 (7)     | 9.4 (8)     |               |                 |  |
| Pneumonectomy                   | 18  | 9.0 (10)    | 9.4 (8)     |               |                 |  |
| Wedge resection                 | 18  | 9.9 (11)    | 8.2 (7)     |               |                 |  |
| Thoracoscopic                   | 12  | 7.2 (8)     | 4.7 (4)     |               |                 |  |
| Postoperative complications     |     |             |             |               |                 |  |
| Reoperation                     | 9   | 3.6 (4)     | 5.9 (5)     | 0.57 (1)      | 0.45            |  |
| Pneumonia                       | 50  | 27 (30)     | 23.8 (20)   | 0.26 (1)      | 0.61            |  |
| Posttreatment                   |     |             |             |               |                 |  |
| Radiation therapy               | 16  | 9.9 (11)    | 5.9 (5)     | 1.04 (1)      | 0.31            |  |
| Chemotherapy                    | 57  | 30.6 (34)   | 27.1 (23)   | 0.30 (1)      | 0.59            |  |
| Physiotherapy                   | 58  | 24.3 (26)   | 38.1 (32)   | 4.24 (1)      | <b>0.04</b>     |  |
| Rehabilitation                  | 24  | 7.5 (8)     | 19.3 (16)   | 5.90 (1)      | <b>0.015</b>    |  |

Abbreviations: SCQ, Self-administered Comorbidity Questionnaire; FEV1, forced expiratory volume in one second; FVC, Forced vital Capacity; EORTC, European Organization for Research and Treatment of Cancer; CES-D, Center for Epidemiologic Studies – Depression Scale; STAI, State-Trait Anxiety Inventory; GSDS, General Sleep Disturbance Scale; BPI, Brief Pain Inventory; LFS, Lee Fatigue Inventory.

Notes: Fatigue, range 0–10, higher score indicating greater fatigue severity; shortness of breath and cough range 1–4, higher score indicating more shortness of breath and cough; depression, range 0–60, higher score indicating more depression; pain, range 0–10, higher score indicating more pain; comorbidity, range 0–57, higher score indicating more comorbidity; anxiety, range 20–80, higher score indicating more anxiety; sleep disturbance, range 0–7, higher score indicating more severe sleep disturbance.

Bold numbers represent significant relationships.

### 3.2. Bivariate analyses

The bivariate analyses between the symptom variables are shown in Table 2. Medical and treatment characteristics including cancer stage, tumor type, type of surgery, and postoperative treatment such as radiation therapy, chemotherapy, physiotherapy, and rehabilitation were not significantly correlated with either preoperative or postoperative

fatigue and, thus, were not included in the final model. Sociodemographic variables including work, education, and cohabitation were excluded before the final analyses for the same reason.

**Table 2**

Correlation matrix for symptoms at baseline, and fatigue baseline and 5-month follow-up (N=196).

|                                   | 1     | 2     | 3     | 4     | 5     | 6    | 7    | 8    | 9   | 10   | 11   | 12 | 13 |
|-----------------------------------|-------|-------|-------|-------|-------|------|------|------|-----|------|------|----|----|
| 1 Age                             | 1     |       |       |       |       |      |      |      |     |      |      |    |    |
| 2 Sex                             | -.16* | 1     |       |       |       |      |      |      |     |      |      |    |    |
| 3 FEV1                            | .06   | .09   | 1     |       |       |      |      |      |     |      |      |    |    |
| 4 FVC                             | .02   | .31*  | .65*  | 1     |       |      |      |      |     |      |      |    |    |
| 5 Fatigue (LFS) baseline          | -.23* | -.01  | -.19* | -.14  | 1     |      |      |      |     |      |      |    |    |
| 6 Fatigue (LFS) 5-month follow-up | -.16* | -.02  | -.22* | -.17* | .52*  | 1    |      |      |     |      |      |    |    |
| 7 Comorbidities (SCQ)             | .04   | .13   | -.23* | -.12  | .29*  | .31* | 1    |      |     |      |      |    |    |
| 8 Shortness of breath (EORTC)     | -.03  | -.16* | -.25* | -.24* | .35*  | .62* | .31* | 1    |     |      |      |    |    |
| 9 Cough (EORTC)                   | -.04  | .01   | -.14  | -.15* | .33*  | .33* | -.04 | .17* | 1   |      |      |    |    |
| 10 Depression (CES-D)             | -.15* | .14   | -.07  | -.03  | .47*  | .31* | .17* | .17* | .12 | 1    |      |    |    |
| 11 Anxiety (STAI)                 | .06   | -.07  | .08   | -.00  | -.24* | -.12 | -.08 | -.01 | -.1 | -.   | 1    |    |    |
|                                   |       |       |       |       |       |      |      |      |     | .28* |      |    |    |
| 12 Sleep disturbance (GSDS)       | -.22* | .03   | -.09  | -.08  | .50*  | .41* | .18* | .26* | .14 | .57* | -.   | 1  |    |
|                                   |       |       |       |       |       |      |      |      |     | .22* |      |    |    |
| 13 Pain (BPI)                     | .1    | -.11  | .09   | .1    | -.25* | -.   | -.   | -.15 | -.  | -.08 | .18* | -. | 1  |
|                                   |       |       |       |       |       | .23* | .18* |      | .02 |      | .23* |    |    |

\* Correlation is significant at the 0.05 level (2-tailed).

Abbreviations: SCQ, Self-administered Comorbidity Questionnaire; FEV1, Forced expiratory volume in one second; FVC, Forced vital Capacity; EORTC, European Organization for Research and Treatment of Cancer; CES-D, Center for Epidemiologic Studies – Depression Scale; STAI, State-Trait Anxiety Inventory; GSDS, General Sleep Disturbance Scale; BPI, Brief Pain Inventory; LFS, Lee Fatigue Inventory.

### 3.3. Multivariate analyses

Hierarchical multiple regression analyses were used to assess the impact of the selected variables on levels of preoperative and postoperative fatigue (Table 3). Age, sex, and clinical variables were unrelated to preoperative fatigue.

**Table 3**

Results from the two hierarchical multivariate linear regression analyses with preoperative fatigue and postoperative fatigue (at 5-month follow-up) were used as dependent variables (N=196).

|                                      | Preoperative fatigue |              |                  | Postoperative fatigue |              |                  |
|--------------------------------------|----------------------|--------------|------------------|-----------------------|--------------|------------------|
|                                      | Beta                 | $\beta$      | p-value          | Beta                  | $\beta$      | p-value          |
| <b>Sociodemographics</b>             |                      |              |                  |                       |              |                  |
| Age                                  | -0.04                | -0.14        | 0.13             | -0.02                 | -0.07        | 0.26             |
| Sex                                  | -0.39                | -0.10        | 0.16             | 0.03                  | 0.01         | 0.93             |
| Explained variance (R <sup>2</sup> ) |                      | <b>5.5%</b>  | <b>0.01</b>      |                       | 2.9%         | 0.10             |
| <b>Clinical variables</b>            |                      |              |                  |                       |              |                  |
| FEV1                                 | -0.00                | -0.05        | 0.63             | -0.00                 | -0.03        | 0.71             |
| FVC                                  | -0.01                | 0.04         | 0.61             | 0.00                  | 0.04         | 0.65             |
| Comorbidity                          | 0.10                 | 0.18         | 0.008            | 0.05                  | 0.08         | 0.19             |
| R <sup>2</sup> change                |                      | <b>10.6%</b> | <b>&lt;0.001</b> |                       | <b>12.1%</b> | <b>&lt;0.001</b> |
| Explained variance                   |                      | 16.1         |                  |                       | 15.0         |                  |
| <b>Fatigue at baseline</b>           |                      |              |                  |                       |              |                  |
| Fatigue                              |                      |              |                  | <b>0.18</b>           | <b>0.17</b>  | <b>0.03</b>      |
| R <sup>2</sup> change                |                      |              |                  |                       | <b>16.2%</b> | <b>&lt;0.001</b> |
| Explained variance                   |                      |              |                  |                       | 31.2%        |                  |
| <b>Other symptoms at baseline</b>    |                      |              |                  |                       |              |                  |
| Shortness of breath                  | 0.33                 | 0.13         | 0.06             | <b>1.27</b>           | <b>0.46</b>  | <b>&lt;0.001</b> |
| <b>Cough</b>                         | <b>0.64</b>          | <b>0.25</b>  | <b>&lt;0.001</b> | <b>0.50</b>           | <b>0.18</b>  | <b>0.004</b>     |
| Depression                           | <b>0.05</b>          | <b>0.23</b>  | <b>0.003</b>     | 0.01                  | 0.04         | 0.63             |
| Anxiety                              | -0.05                | -0.07        | 0.29             | 0.00                  | 0.00         | 0.95             |
| Sleep disturbance                    | <b>0.02</b>          | <b>0.20</b>  | <b>0.01</b>      | 0.01                  | 0.11         | 0.12             |
| Pain                                 | <b>0.44</b>          | <b>0.20</b>  | <b>0.01</b>      | -0.29                 | -0.07        | 0.26             |
| R <sup>2</sup> change                |                      | <b>30.5%</b> | <b>&lt;0.001</b> |                       | <b>23.2%</b> | <b>&lt;0.001</b> |
| Explained variance                   |                      | 46.6%        |                  |                       | 54.3%        |                  |

Abbreviations: FEV1, Forced expiratory volume in one second; FVC, Forced vital capacity.

Note: Bold numbers represent significant relationships.

At baseline, patients who reported pain scored higher on fatigue (M=2.9, SD=2.05) compared with patients who reported no pain (M=2.03, SD=1.8, t=3.28, p=0.001). Patients who reported pain at baseline also reported higher mean fatigue at five-month follow-up (M=3.54, SD=2.21) compared with those who reported no pain at baseline (M=2.55,

1  
2  
3 SD=2.04,  $t=3.08$ ,  $p=0.002$ ). Among the reported symptoms, coughing, depression, sleep  
4 disturbance, and pain interference were related to preoperative fatigue after controlling for  
5 age, sex, clinical variables, and the other symptoms. The total model explained 46.6% of  
6 variance, while 30.5% was explained by the other symptoms.  
7  
8  
9  
10

11  
12 At five-month follow-up, the only variables that predicted fatigue after controlling for  
13 age, sex, clinical variables, preoperative fatigue, and symptoms were shortness of breath and  
14 coughing. The total model explained 54.3% of variance, while 23.2% was explained by the  
15 other symptoms.  
16  
17  
18  
19  
20  
21

#### 22 **4. Discussion**

23  
24  
25 To our knowledge, this is the first study examining fatigue in surgically treated patients  
26 with LC , including both preoperative data and data from five-month follow-up. Preoperative  
27 fatigue was significantly correlated with comorbidities and all the included symptoms in the  
28 bivariate analyses, while postoperative fatigue was significantly correlated with comorbidities  
29 and four out of six measured symptoms. However, shortness of breath was the only baseline  
30 variable that predicted postoperative fatigue.  
31  
32  
33  
34  
35  
36  
37  
38  
39

##### 40 *4.1. Relationship between postoperative fatigue level and preoperative symptoms*

41  
42  
43 Shortness of breath, coughing, depression, anxiety, sleep disturbance, and pain  
44 interference were significantly correlated with level of preoperative fatigue. Except for  
45 anxiety and pain interference, the same symptoms were associated with postoperative fatigue  
46 in the bivariate analyses at five-month follow-up. Before surgery, cough was significantly  
47 associated with fatigue, while shortness of breath was the symptom predictive of  
48 postoperative fatigue. Shortness of breath is a prevalent and disturbing symptom in these  
49 patients, which is physiologically based on disease location, damage caused by lung tumors,  
50 and history of smoking. Shortness of breath requires intensive effort to breath, thus making  
51  
52  
53  
54  
55  
56  
57  
58  
59  
60



1  
2  
3 patients tired. The constant use of rib and respiratory muscles caused by shortness of breath  
4  
5 can exacerbate fatigue.[41] These patients may benefit from prescribed bronchodilators and  
6  
7 non-pharmacological treatment such as physical activity. For some, it may be useful to learn  
8  
9 how to manage shortness of breath by controlled breathing techniques and practicing calming  
10  
11 techniques during shortness of breath episodes.  
12  
13

14  
15 Consistent with previous research, we found that fatigue in patients with LC undergoing  
16  
17 surgery is correlated with their symptoms and might cluster with other symptoms.[2,42]  
18  
19 Cheville et al.,[2] found a cluster of fatigue, cough, and dyspnea in LC survivors lasting for  
20  
21 eight years; however, in a later study, the same group found that the cluster did not predict  
22  
23 patient outcomes but that fatigue and dyspnea, alone and together, were sufficient to predict  
24  
25 important outcomes.[8]  
26  
27

#### 28 29 *4.2. Relationship between fatigue and patients' disease characteristics and treatment* 30 31

32  
33 Although comorbidities did not predict postoperative fatigue in our analyses, there was  
34  
35 a bivariate relationship with fatigue both pre- and postoperatively. Others have also reported  
36  
37 correlations between comorbidity and fatigue.[6,12] Respiratory comorbidities and cardiac  
38  
39 disease are especially related to fatigue in patients with LC.[3,43] We also found a correlation  
40  
41 between fatigue and spirometry results, with lower FEV1 and FVC related to higher levels of  
42  
43 fatigue at both measurement times. These variables were related to comorbidity and are an  
44  
45 important factor in identifying and screening patients at risk for developing fatigue. Poorer  
46  
47 respiratory test outcomes could indicate shortness of breath or respiratory comorbidities, such  
48  
49 as COPD, and may lead to distress and exhaustion and contribute to fatigue in these patients.  
50  
51

52  
53 Surgery type has been established as a predictor of fatigue in LC survivors and surgery  
54  
55 has been associated with a greater symptom burden generally.[21] In the present study,  
56  
57 treatment and disease variables did not correlate with postoperative fatigue at five-month  
58  
59 follow-up. These findings are inconsistent with other reports in which correlations have been  
60

1  
2  
3 found between fatigue and chemotherapy,[9] and radiotherapy.[11] However, our findings are  
4  
5 consistent with those from a general cancer population on the symptom cluster of pain,  
6  
7 fatigue, sleep disturbance, and depression. That group found that symptom experiences were  
8  
9 independent of demographic, disease, or treatment effects; their findings suggest that different  
10  
11 subgroups of patients may harbor different determinants (e.g., genetic) for experiencing  
12  
13 symptoms and suggested etiology that are independent of demographic, disease, or treatment  
14  
15 characteristics.[44]  
16  
17

#### 18 19 20 *4.3. Limitations* 21

22  
23 Some study limitations need to be acknowledged. There was a five-month gap between  
24  
25 the two measurement points. During this time, other factors might have influenced patients'  
26  
27 fatigue experience. Surgery type might also be a predictor of patient fatigue.[21] In this study,  
28  
29 only 6% of patients had video-assisted thoracoscopy; thus, it is not possible to determine  
30  
31 whether this influenced postoperative fatigue. Detailed information on symptom management  
32  
33 interventions such as physiotherapy and rehabilitation was not collected. However, even if  
34  
35 these variables had been included, no detailed information about the type and length of these  
36  
37 therapies was available.  
38  
39  
40

#### 41 42 **5. Conclusions** 43

44  
45 Based on the findings in the present study, patients should be screened for symptoms  
46  
47 before surgery and offered treatment for their symptoms to reduce pre- and postoperative  
48  
49 fatigue. Special attention should be given to treating patients' shortness of breath, since this is  
50  
51 a modifiable predictor for which treatments are available. Further research should pay specific  
52  
53 attention to the pair of symptoms of shortness of breath and fatigue, and to the effects on  
54  
55 fatigue and QOL when shortness of breath is treated.  
56  
57  
58  
59  
60

1  
2  
3  
4  
5  
6  
7  
8  
9  
10  
11  
12  
13  
14  
15  
16  
17  
18  
19  
20  
21  
22  
23  
24  
25  
26  
27  
28  
29  
30  
31  
32  
33  
34  
35  
36  
37  
38  
39  
40  
41  
42  
43  
44  
45  
46  
47  
48  
49  
50  
51  
52  
53  
54  
55  
56  
57  
58  
59  
60

**Fig. 1.** Flowchart of the enrollment and exclusion of patients in the study.

For peer review only

## Acknowledgements

We thank all of the patients who kindly participated and the nurses and physicians at Oslo University Hospital, St. Olav University Hospital, and Haukeland University Hospital who facilitated data collection.

## Footnotes

**Contributors:** TR and TO conceptualised the study. TO wrote the protocol manuscript and TR contributed to protocol development. TO had responsibility for data collection. TH and AL conducted the data analyses and drafted the initial report. TO and TR critically reviewed and edited the manuscript. All authors read and approved the final manuscript. Each author contributed to interpreting the analyses and to critically revising the article, and approved the final draft.

**Funding:** The study was funded by the Norwegian Cancer Association.

**Patient consent:** Each participant signed informed consent.

**Ethics approval** The Regional Ethics Committee for the South-East 2010/1508, and the Institutional Review Boards (Personvernombudet) at each hospital approved the study. Each participant received written information about the study and signed informed consent.

**Data availability statement:** All data relevant to the study are included in the article.

**Competing interests:** None declared.

**Provenance and peer review** Not commissioned; externally peer reviewed.

## References

1 Kreftregisteret. Available from <https://www.kreftregisteret.no/en/General/Publications/Cancer-in-Norway/cancer-in-norway-2017/> (Accessed 10 May 2019).

1  
2  
3 2 Cheville AL, Novotny PJ, Sloan JA et al. Fatigue, dyspnea, and cough comprise a  
4 persistent symptom cluster up to five years after diagnosis with lung cancer. *J Pain Symptom*  
5 *Manage* 2011;42:202–212. doi:10.1016/j.jpainsymman.2010.10.257.

6  
7 3 Hung R, Krebs P, Coups EJ, et al. Fatigue and functional impairment in early-stage non-  
8 small cell lung cancer survivors. *J Pain Symptom Manage* 2011;41:426–435.  
9 doi:10.1016/j.jpainsymman.2010.05.017.

10  
11 4 Portenoy RK, Itri LM. Cancer-related fatigue: guidelines for evaluation and  
12 Management. *Oncologist* 1991;4:1–10. doi:10.1097/01893697-200119020-00038.

13  
14 5 Lee KA, Hicks G, Nino-Murcia G, Validity and reliability of a scale to assess fatigue.  
15 *Psychiatry Res* 1990;36:291–298. doi:10.1016/0165-1781(91)90027.

16  
17 6 Carnio S, Di Stefano RF, Novello S. Fatigue in lung cancer patients: symptom burden  
18 and management of challenges. *Lung Cancer (Auct)* 2016;7:73–82. doi:  
19 0.2147/LCTT.S85334.

20  
21 7 Sarna L, Padilla G, Holmes C, et al. Quality of life of long-term survivors of non-small-cell  
22 lung cancer. *J. Clin Oncol* 2002;20:2920–2929. doi:10.1200/JCO.2002.09.045.

23  
24 8 Cheville AL, Novotny PJ, Sloan JA, et al. The value of a symptom cluster of fatigue,  
25 dyspnea, and cough in predicting clinical outcomes in lung cancer survivors. *J Pain Symptom*  
26 *Manag* 2011;42:213–221. doi:10.1016/j.jpainsymman.2010.11.005.

27  
28 9 Long NH, Thanasilp S, Thato R. A causal model for fatigue in lung cancer patients  
29 receiving chemotherapy. *Eur J Oncol Nurs* 2016;21:242-247.  
30 doi:10.1016/j.ejon.2015.10.010.

31  
32 10 Molassiotis A, Lowe M, Blackhall F, et al. A qualitative exploration of a respiratory distress  
33 symptom cluster in lung cancer: cough, breathlessness and fatigue. *Lung Cancer*  
34 2011;71:94–102. doi:10.1016/j.lungcan.2010.04.002.

35  
36 11 Ozturk A, Sarihan S, Ercan I, et al. Evaluating quality of life and pulmonary function of  
37 long-term survivors of non-small cell lung cancer treated with radical or postoperative  
38 radiotherapy. *Am J Clin Oncol* 2009;32:65-72. doi:10.1097/COC.0b013e31817e6ec2.

39  
40 12 Sarna L, Cooley ME, Brown JK, et al. Symptom severity 1 to 4 months after thoracotomy  
41 for lung cancer. *Am J of Crit Care* 2008;17:455-467.

42  
43 13 Poghosyan H, Sheldon LK, Leveille SG, et al. Health-related quality of life after surgical  
44 treatment in patients with non-small cell lung cancer: a systematic review. *Lung Cancer*  
45 2013;81:11-26. doi:10.1016/j.lungcan.2013.03.013.

46  
47 14 Hoffman AJ, Given BA, von Eye A, et al. Relationships among pain, fatigue, insomnia,  
48 and gender in persons with lung cancer. *Oncol Nurs Forum* 2007;34:785.  
49 <http://ezproxy.diastud.no/docview/223105953?accountid=37793>.

50  
51 15 Wright F, Melkus GDE, Hammer M, et al. Trajectories of evening fatigue in oncology  
52 outpatients receiving chemotherapy. *J Pain Symptom Manag* 2015;50:163-175.  
53 doi:10.1016/j.jpainsymman.2015.02.015.

54  
55 16 Wright F, Melkus GDE, Hammer M, et al. Predictors and trajectories of morning fatigue  
56 are distinct from evening fatigue. *J Pain Symptom Manag* 2015;50:176-189.  
57 doi:10.1016/j.jpainsymman.2015.02.016

- 1  
2  
3  
4 17 Storey DJ, Waters RA, Hibberd CJ, et al. Clinically relevant fatigue in cancer outpatients:  
5 the Edinburgh Cancer Centre symptom study. *Ann Oncol* 2007;18:1861-1869.  
6 doi:10.1093/annonc/mdm349.  
7
- 8 18 Huang X, Zhou W, Zhang Y. Features of fatigue inpatients with early-stage non-small  
9 cell lung cancer. *J Res Med Sci*; 2015;20:268–272.  
10
- 11 19 Lerdal A, Wahl A, Rustøen T, Hanestad BR, Moum T. Fatigue in the general population: a  
12 translation and test of the psychometric properties of the Norwegian version of the fatigue  
13 severity scale. *Scand J Public Health* 2005;33:123-130. doi:10.1080/14034940410028406  
14
- 15 20 Loge JH, Ekeberg Ø, Kaasa S. Fatigue in the general Norwegian population: Normative  
16 data and associations. *J Psychosomatic Research* 1998;45:53-65. doi:10.1016/S0022-  
17 3999(97)00291-2  
18
- 19 21 Yang P, Chevillat AL, J.A. Wampfler JA, et al., Quality of life and symptom burden among  
20 long term lung cancer survivors: changing and adapting, *J Thorac Oncol* 2012;7:64–70.  
21 [doi:10.1097/JTO.0b013e3182397b3e](https://doi.org/10.1097/JTO.0b013e3182397b3e).  
22
- 23 22 Oksholm T, Rustoen T, Cooper B, et al. Trajectories of symptom occurrence and severity  
24 from before through five months after lung cancer surgery. *J Pain Symptom Manag*  
25 *2015;49:995–1015*. doi:10.1016/j.jpainsymman.2014.11.297.  
26
- 27 23 Oksholm T, Miaskowski C, Solberg S, et al., Changes in symptom occurrence and  
28 severity before and after lung cancer surgery, *Cancer Nurs* 2015;38:351–357. doi:  
29 10.1097/NCC.000000000000198.  
30
- 31 24 Oksholm T, Miaskowski C, J.S. Kongerud JS, et al. Does age influence the symptom  
32 experience of lung cancer patients prior to surgery? *Lung Cancer* 2013;82:156–161.  
33 doi:10.1016/j.lungcan.2013.06.016.  
34
- 35 25 Sangha O, Stucki G, Liang MH, et al. The Self-Administered Comorbidity Questionnaire: a  
36 new method to assess comorbidity for clinical and health services research. *Arthrit Care Res*  
37 *2003;49:156–163*. [doi:10.1002/art.10993](https://doi.org/10.1002/art.10993).  
38
- 39 26 Miaskowski C, Lee KA. Pain, fatigue, and sleep disturbances in oncology outpatients  
40 receiving radiation therapy for bone metastasis: a pilot study. *J Pain Symptom Manag*  
41 *1999;17:320–332*. doi:10.1016/S0885-3924(99)00008-1.  
42
- 43 27 Lerdal A, Kottorp A, Gay CL, et al. Lee Fatigue and Energy Scales: exploring  
44 aspects of validity in a sample of women with HIV using an application of a Rasch model,  
45 *Psychiatry Res* 2013;205;241–246. [doi:10.1016/j.psychres.2012.08.031](https://doi.org/10.1016/j.psychres.2012.08.031).  
46
- 47 28 Bergman B, Aaronson N, Ahmedzai S, et al. The EORTC QLQ-LC13: a modular  
48 supplement to the EORTC core quality of life questionnaire (QLQ-C30) for use in  
49 lung cancer clinical trials. *Eur J Cancer* 1994;30:635–642. [doi:10.1016/0959](https://doi.org/10.1016/0959-8049(94)90535-5)  
50 8049(94)90535-5.  
51
- 52 29 Giesinger JM, Kieffer JM, Fayers PM, et al. Replication and validation of higher order  
53 models demonstrated that a summary score for the EORTC QLQ-C30 is robust. *J Clin*  
54 *Epidemiol* 2016;69:79–88. doi:10.1016/j.jclinepi.2015.08.007.  
55
- 56 30 Michelson H, Bolund C, Nilsson B, et al. Health-related quality of life  
57 measured by the EORTC QLQ-C30: reference values from a large sample of the Swedish  
58  
59  
60

- 1  
2  
3 population. *Acta Oncol* 2000;39:477–484. doi:10.1080/028418600750013384  
4  
5 31 Radloff LS. The CES-D scale: a self-report depression scale for the general population,  
6 *Appl Psych Mea*. 1977;1:385–401. doi:10.1177/014662167700100306.  
7  
8 32 Sheehan JT, Fifield J, Reisine S, et al. The measurement structure of the Center  
9 for Epidemiologic Studies Depression Scale. *J Pers Assess* 1995;64:507-521.  
10 doi:10.1207/s15327752jpa6403\_9.  
11  
12 33 Spielberger CD, Gorsuch RC, Lushene RE, et al. Manual for the  
13 State-Trait Anxiety Inventory (Form Y): Self-Evaluation Questionnaire. Consulting  
14 Psychologists Press, Palo Alto, CA, 1983.  
15  
16 34 Cataldo JK, Brodsky JL. Lung cancer stigma, anxiety, depression and symptom  
17 Severity. *Oncology* 2013;85:33–40. doi:10.1159/000350834.  
18  
19 35 Lee KA. Self-reported sleep disturbances in employed women. *Sleep* 1992;15:493-  
20 498. doi:10.1093/sleep/15.6.493.  
21  
22 36 Cleeland CS, Measurement and prevalence of pain in cancer. *Seminars in Onc Nurs*  
23 1985;1:87–92. doi: 10.1016/S0749-2081(85)80041-3.  
24  
25 37 Klepstad P, Loge JH, Borchgrevink PC, et al. The Norwegian Brief Pain Inventory  
26 Questionnaire: translation and validation in cancer pain patients. *J Pain Symptom Manag*  
27 2002;24: 517–525. doi /10.1016/S0885-3924(02)00526-2.  
28  
29 38 von Elm E, Altman DG, Egger M, et al. Strengthening the Reporting of Observational  
30 Studies in Epidemiology (STROBE) statement: guidelines for reporting observational studies.  
31 *BMJ* 2007;335:806-8.  
32  
33 39 Cohen J. A power primer: quantitative methods in psychology. *Psychological Bulletin*  
34 1992;112;155-159. doi:10.1037/0033-2909.112.1.155  
35  
36 40 Soper DS. Post-hoc statistical power calculator for hierarchical multiple regression  
37 (Software) 2017. Available from: <http://www.danielsoper.com/statcalc/references.aspx?id=17>  
38 (Accessed 10 May 2019).  
39  
40 41 Esper P, Heidrich D, Symptom clusters in advanced illness. *Seminars in Oncology*  
41 *Nursing* 2005;25:20–28. doi:10.1053/j.soncn.2004.10.004.  
42  
43 42 Lin S, Chen Y, Yang L, et al. Pain, fatigue, disturbed sleep and distress comprised a  
44 symptom cluster that related to quality of life and functional status of lung cancer surgery  
45 patients. *J Clinical Nurs* 2013; 22.9-10:1281–1289. doi:10.1111/jocn.12228.  
46  
47 43 Yun YH, Kim YA, Min YH, et al., Health-related quality of life in disease-free survivors of  
48 surgically treated lung cancer compared with the general population, *Ann Surg*  
49 2012;255:1000–1007. doi:10.1097/SLA.0b013e31824f1e9e.  
50  
51 44 Miaskowski C, Cooper BA, Paul SM, et al. Subgroups of patients with cancer with  
52 different symptom experiences and quality-of-life outcomes: a cluster analysis. *Oncol Nurs*  
53 *Forum* 2006;33.  
54  
55  
56  
57  
58  
59  
60

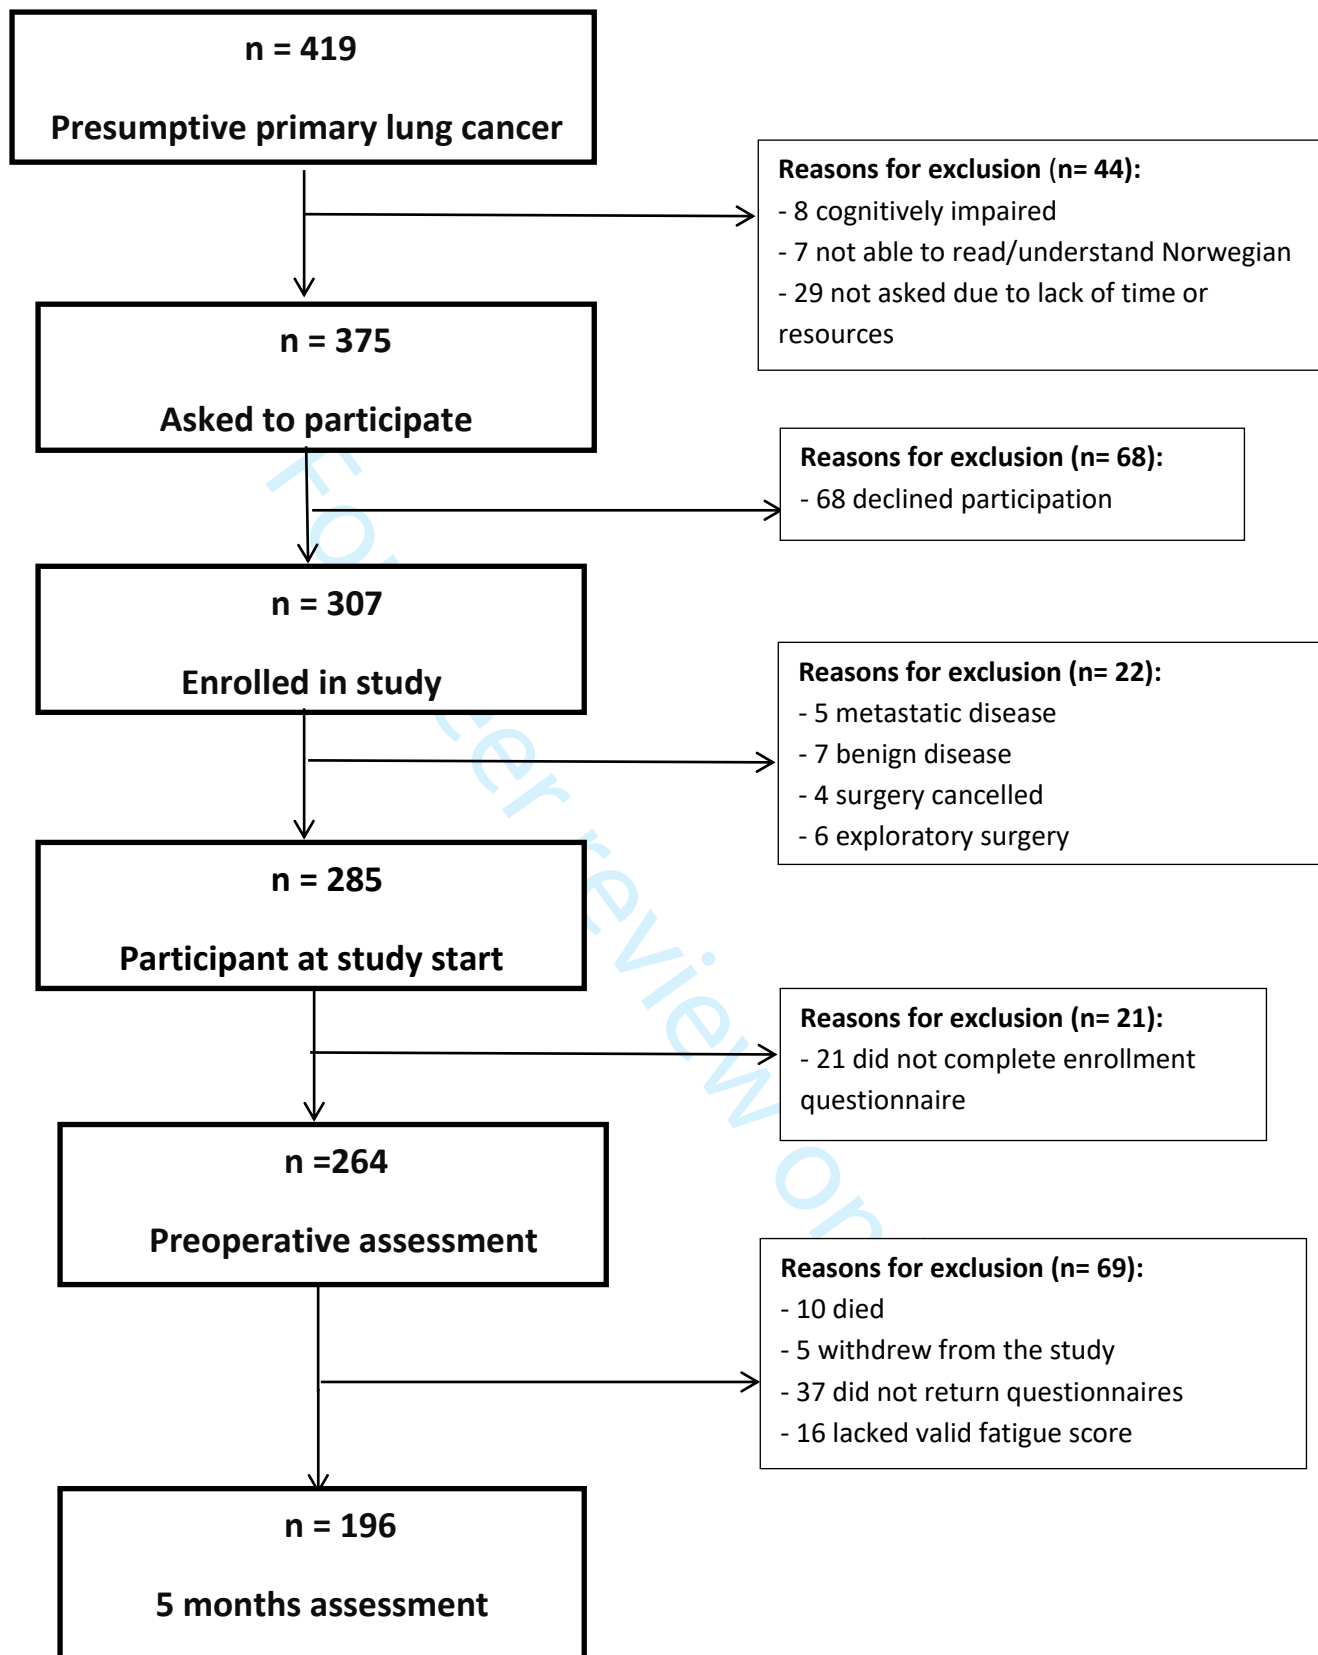



STROBE Statement—Checklist of items that should be included in reports of *cohort studies*

|                              | Item No | Recommendation                                                                                                                                                                                    |
|------------------------------|---------|---------------------------------------------------------------------------------------------------------------------------------------------------------------------------------------------------|
| <b>Title and abstract</b>    | 1       | (a) Indicate the study's design with a commonly used term in the title or the abstract<br>Page: 1 and 2                                                                                           |
|                              |         | (b) Provide in the abstract an informative and balanced summary of what was done and what was found<br>Page: 2                                                                                    |
| <b>Introduction</b>          |         |                                                                                                                                                                                                   |
| Background/rationale         | 2       | Explain the scientific background and rationale for the investigation being reported<br>Page: 3 and 4                                                                                             |
| Objectives                   | 3       | State specific objectives, including any prespecified hypotheses<br>Page: 4                                                                                                                       |
| <b>Methods</b>               |         |                                                                                                                                                                                                   |
| Study design                 | 4       | Present key elements of study design early in the paper<br>Page: 5                                                                                                                                |
| Setting                      | 5       | Describe the setting, locations, and relevant dates, including periods of recruitment, exposure, follow-up, and data collection<br>Page: 5                                                        |
| Participants                 | 6       | (a) Give the eligibility criteria, and the sources and methods of selection of participants. Describe methods of follow-up<br>Page: 5 and 6                                                       |
|                              |         | (b) For matched studies, give matching criteria and number of exposed and unexposed<br>Page: Not actual                                                                                           |
| Variables                    | 7       | Clearly define all outcomes, exposures, predictors, potential confounders, and effect modifiers. Give diagnostic criteria, if applicable<br>Page: 5-8                                             |
| Data sources/<br>measurement | 8*      | For each variable of interest, give sources of data and details of methods of assessment (measurement). Describe comparability of assessment methods if there is more than one group<br>Page: 5-8 |
| Bias                         | 9       | Describe any efforts to address potential sources of bias<br>Page: Not actual                                                                                                                     |
| Study size                   | 10      | Explain how the study size was arrived at<br>Page: 10                                                                                                                                             |
| Quantitative variables       | 11      | Explain how quantitative variables were handled in the analyses. If applicable, describe which groupings were chosen and why<br>Page:                                                             |
| Statistical methods          | 12      | (a) Describe all statistical methods, including those used to control for confounding<br>Page: 9                                                                                                  |
|                              |         | (b) Describe any methods used to examine subgroups and interactions<br>Page: 9                                                                                                                    |
|                              |         | (c) Explain how missing data were addressed<br>Page: 9                                                                                                                                            |
|                              |         | (d) If applicable, explain how loss to follow-up was addressed<br>Page: 9                                                                                                                         |
|                              |         | (e) Describe any sensitivity analyses<br>Page: 9                                                                                                                                                  |

| <b>Results</b>           |     |                                                                                                                                                                                                                           |
|--------------------------|-----|---------------------------------------------------------------------------------------------------------------------------------------------------------------------------------------------------------------------------|
| Participants             | 13* | (a) Report numbers of individuals at each stage of study—eg numbers potentially eligible, examined for eligibility, confirmed eligible, included in the study, completing follow-up, and analysed<br>Page: Fig 1, page 10 |
|                          |     | (b) Give reasons for non-participation at each stage<br>Page: Fig 1, page 10                                                                                                                                              |
|                          |     | (c) Consider use of a flow diagram<br>Page: Fig 1, page 10                                                                                                                                                                |
| Descriptive data         | 14* | (a) Give characteristics of study participants (eg demographic, clinical, social) and information on exposures and potential confounders<br>Page: 11                                                                      |
|                          |     | (b) Indicate number of participants with missing data for each variable of interest<br>Page: 11                                                                                                                           |
|                          |     | (c) Summarise follow-up time (eg, average and total amount)<br>Page: 11                                                                                                                                                   |
| Outcome data             | 15* | Report numbers of outcome events or summary measures over time<br>Page: 10 -12                                                                                                                                            |
| Main results             | 16  | (a) Give unadjusted estimates and, if applicable, confounder-adjusted estimates and their precision (eg, 95% confidence interval). Make clear which confounders were adjusted for and why they were included<br>Page: 12  |
|                          |     | (b) Report category boundaries when continuous variables were categorized<br>Page: 12                                                                                                                                     |
|                          |     | (c) If relevant, consider translating estimates of relative risk into absolute risk for a meaningful time period<br>Page: Not actual                                                                                      |
| Other analyses           | 17  | Report other analyses done—eg analyses of subgroups and interactions, and sensitivity analyses<br>Page: Not actual                                                                                                        |
| <b>Discussion</b>        |     |                                                                                                                                                                                                                           |
| Key results              | 18  | Summarise key results with reference to study objectives<br>Page: 14                                                                                                                                                      |
| Limitations              | 19  | Discuss limitations of the study, taking into account sources of potential bias or imprecision. Discuss both direction and magnitude of any potential bias<br>Page: 2 + 16                                                |
| Interpretation           | 20  | Give a cautious overall interpretation of results considering objectives, limitations, multiplicity of analyses, results from similar studies, and other relevant evidence<br>Page: 15 and 16                             |
| Generalisability         | 21  | Discuss the generalisability (external validity) of the study results<br>Page: 16                                                                                                                                         |
| <b>Other information</b> |     |                                                                                                                                                                                                                           |
| Funding                  | 22  | Give the source of funding and the role of the funders for the present study and, if applicable, for the original study on which the present article is based<br>Page: 18                                                 |

\*Give information separately for exposed and unexposed groups.

1 **Note:** An Explanation and Elaboration article discusses each checklist item and gives methodological background and  
2 published examples of transparent reporting. The STROBE checklist is best used in conjunction with this article (freely  
3 available on the Web sites of PLoS Medicine at <http://www.plosmedicine.org/>, Annals of Internal Medicine at  
4 <http://www.annals.org/>, and Epidemiology at <http://www.epidem.com/>). Information on the STROBE Initiative is  
5 available at <http://www.strobe-statement.org>.  
6  
7  
8  
9  
10  
11  
12  
13  
14  
15  
16  
17  
18  
19  
20  
21  
22  
23  
24  
25  
26  
27  
28  
29  
30  
31  
32  
33  
34  
35  
36  
37  
38  
39  
40  
41  
42  
43  
44  
45  
46  
47  
48  
49  
50  
51  
52  
53  
54  
55  
56  
57  
58  
59  
60

For peer review only

# BMJ Open

## Predicting postoperative fatigue in surgically treated lung cancer patients in Norway– a longitudinal five-month follow-up study.

|                                 |                                                                                                                                                                                                                                                                                                                                                                                                                                                                                                                                                                                                                       |
|---------------------------------|-----------------------------------------------------------------------------------------------------------------------------------------------------------------------------------------------------------------------------------------------------------------------------------------------------------------------------------------------------------------------------------------------------------------------------------------------------------------------------------------------------------------------------------------------------------------------------------------------------------------------|
| Journal:                        | <i>BMJ Open</i>                                                                                                                                                                                                                                                                                                                                                                                                                                                                                                                                                                                                       |
| Manuscript ID                   | bmjopen-2018-028192.R2                                                                                                                                                                                                                                                                                                                                                                                                                                                                                                                                                                                                |
| Article Type:                   | Original research                                                                                                                                                                                                                                                                                                                                                                                                                                                                                                                                                                                                     |
| Date Submitted by the Author:   | 26-Aug-2019                                                                                                                                                                                                                                                                                                                                                                                                                                                                                                                                                                                                           |
| Complete List of Authors:       | Hugoy, Therese ; University of Oslo, Institute of Health and Society, Faculty of Medicine, ; Lovisenberg Diakonale Hogskole Lerdal, Anners; University of Oslo, Dept. of Interdisciplinary Health Sciences, Institute of Health and Society; Lovisenberg Diakonale Hospital, Dept. of Research<br>Rustoen, Tone; University of Oslo, Norway, Institute of Health and Society, Faculty of Medicine; Oslo universitetssykehus Ulleval, Department of Research and Development, Division of Emergencies and Critical Care<br>Oksholm, Trine; VID Vitenskapelige Hogskole, Faculty of Health Studies, Campus Haraldsplass |
| <b>Primary Subject Heading</b>: | Nursing                                                                                                                                                                                                                                                                                                                                                                                                                                                                                                                                                                                                               |
| Secondary Subject Heading:      | Oncology, Surgery                                                                                                                                                                                                                                                                                                                                                                                                                                                                                                                                                                                                     |
| Keywords:                       | Fatigue, Lung Cancer, Neoplasm, Quality of Life, SURGERY                                                                                                                                                                                                                                                                                                                                                                                                                                                                                                                                                              |
|                                 |                                                                                                                                                                                                                                                                                                                                                                                                                                                                                                                                                                                                                       |

SCHOLARONE™  
Manuscripts

1  
2  
3 **Predicting postoperative fatigue in surgically treated lung cancer patients in Norway– a**  
4 **longitudinal five-month follow-up study.**  
5  
6

7 Therese Hugøy<sup>a,b,c</sup>, Anners Lerdal<sup>d,e</sup> Tone Rustøen<sup>a,f</sup>, Trine Oksholm<sup>g</sup>  
8  
9

10  
11 <sup>a</sup>Department of Nursing Science, Institute of Health and Society, Faculty of Medicine,  
12 University of Oslo, Norway.  
13

14 <sup>b</sup>Centre for Patient centered heart- and lung research. Department of cardiothoracic surgery.  
15 Division of Cardiovascular and Pulmonary Diseases. Oslo University Hospital, Oslo, Norway.  
16  
17

18 <sup>c</sup>Lovisenberg Diaconal University College, Lovisenberggt. 15B, 0456 Oslo, Norway  
19

20 <sup>d</sup>Dept. of Interdisciplinary Health Sciences, Institute of Health and Society, Faculty of  
21 Medicine  
22

23 <sup>e</sup>Department for Patient Safety and Research, Lovisenberg Diaconal Hospital, P.O. Box 4970  
24 Nydalen,0440 Oslo, Norway  
25  
26

27 <sup>f</sup>Department of Research and Development, Division of Emergencies and Critical Care, Oslo  
28 University Hospital, P.O. Box 4956 Nydalen, 0424 Oslo, Norway;  
29

30 <sup>g</sup> VID Specialized University, Faculty of Health Studies, Campus Haraldsplass, P.O. Box 184  
31 Vinderen, 0319 Oslo, Norway  
32  
33

34  
35  
36 \*Corresponding author at:  
37 Trine Oksholm  
38 trine.oksholm@vid.no  
39  
40  
41  
42  
43

44 Word count: 3275  
45  
46  
47  
48  
49  
50  
51  
52  
53  
54  
55  
56  
57  
58  
59  
60

1  
2  
3 ABSTRACT  
4

5 *Objectives:* Despite the negative influence of fatigue on quality of life in patients who  
6  
7 undergo lung cancer surgery, little is known about the possible predictors of postoperative  
8  
9 fatigue. The aim of this study was to examine demographic and clinical characteristics that  
10  
11 might predict postoperative fatigue five months after lung cancer surgery.  
12  
13

14 *Design:* A prospective longitudinal follow up study comprising pre- and postoperative  
15  
16 questionnaires, including Lee Fatigue Scale, and sociodemographic and clinical data.  
17  
18

19 *Setting:* Three university hospitals in Norway (e.g., Oslo University Hospital, St. Olav  
20  
21 University Hospital, Haukeland University Hospital).  
22  
23

24 *Participants:* In total, 196 surgically treated patients who answered the questionnaires both  
25  
26 preoperatively and at five-month follow-up with valid fatigue scores.  
27  
28

29 *Results:* Bivariate analyses showed that preoperative fatigue was associated with  
30  
31 comorbidities and the symptoms of shortness of breath, cough, depression, anxiety, sleep  
32  
33 disturbance, and pain. Only cough was directly associated with preoperative fatigue in a  
34  
35 regression model. Comorbidities and the symptoms of shortness of breath, cough, depression,  
36  
37 and sleep disturbance were associated with postoperative fatigue in the bivariate analyses, but  
38  
39 only shortness of breath was associated with postoperative fatigue in the regression model.  
40  
41

42 We did not find any significant correlations between fatigue and any treatment variable.  
43  
44

45 *Conclusion:* Clinicians should pay special attention to lung symptoms and be aware that these  
46  
47 may lead to long-term postoperative fatigue. Further research should examine whether  
48  
49 interventions reducing lung symptoms, such as shortness of breath and coughing, may prevent  
50  
51 development of fatigue in patients undergoing lung cancer surgery.  
52  
53

54  
55  
56 *Key words:* Fatigue, Lung Cancer, Neoplasm, Quality of Life, Surgery  
57  
58  
59  
60

### Strengths and limitations of this study

- Fatigue is a symptom that has a great impact on patients quality of life and this topic is relevant both to patients and healthcare providers
- A rather large sample of surgically treated lung cancer patients were included in the study patients', fatigue was measured both preoperatively and after surgery. This gives information about fatigue after lung cancer surgery.
- There was a five-month gap between the two measurement points. During this time, other factors might have influenced patients' fatigue experience.
- There were limited information on symptom management interventions such as physiotherapy and rehabilitation

### 1. Introduction

Lung cancer (LC) is presently one of the most common malignancies, and it is estimated that 20% of cancer-related deaths are caused by LC.[1] Only 20% of patients diagnosed with non-small-cell lung cancer meet the criteria for surgery due to their late stage at diagnosis; for these patients, surgery may be curative.[2] In Norway during 2014, five-year LC survival was generally 19% in women and 13% in men.[1] In surgically treated patients, the five-year survival ranges from 50% to 70%, depending on the tumor stage at surgery.

Fatigue is common among cancer patients. An estimated 75–90% of patients with LC report fatigue after cancer treatment.[3,4] Fatigue has been described as a complex, multidimensional symptom and has been defined as a sense of exhaustion, lack of energy, or tiredness distinct from sleepiness, sadness, or weakness.[5] Cancer-related fatigue is related to cancer or its treatment, and interferes with usual functioning.[3] Fatigue has a negative impact on patients' health-related quality of life (HRQOL),[6] their ability to receive treatment, and their long-term prognosis. Although there are limited data on LC and fatigue in patients who have undergone surgery, it has been shown that fatigue has a negative impact on HRQOL in

1  
2  
3 LC survivors.[7] One study showed that fatigue was a significant predictor of survival at each  
4  
5 time point assessed.[8] In another study on symptom severity after thoracotomy, fatigue was  
6  
7 reported as the most common and severe symptom at every time point.[7]  
8  
9

10 Several studies have reported interrelations between fatigue, cough, and dyspnea.[8–11]  
11  
12 Fatigue is also strongly related to symptoms of depression and anxiety.[12,13] Associations  
13  
14 between fatigue and sex, pain, insomnia, and dyspnea have also been reported.[12,14] Studies  
15  
16 on fatigue in populations with lung cancer in different stages have also shown strong  
17  
18 correlations between fatigue and sleep disturbance.[6,15–17] Sarna et al.,[12] found that  
19  
20 symptom severity in surgical patients was related to the extent of their comorbid condition.  
21  
22 Other studies of patients with LC have also shown correlations between comorbidities and  
23  
24 fatigue,[6] as well as strong correlations between pulmonary diseases such as COPD and  
25  
26 asthma, and fatigue.[3,18] Studies of fatigue in the general population has shown a higher  
27  
28 proportion of severe fatigue cases among women than among men.[19,20] Thus, examining  
29  
30 differences in fatigue in relation to sex among LC patients is of interest. Fatigue has a  
31  
32 negative impact on both patients with LC and survivors in general;[21] however, to our  
33  
34 knowledge, there have been no studies to date specifically investigating fatigue in surgically  
35  
36 treated patients with LC.  
37  
38  
39  
40  
41

42 Thus, our aim was to examine the relationships between fatigue and disease  
43  
44 characteristics, treatment, and other symptoms. We hypothesized that fatigue levels at five-  
45  
46 month follow-up would be significantly related to: (1) sex, (2) clinical variables (preoperative  
47  
48 comorbidities, forced expiratory volume in one second [FEV1], and forced vital capacity  
49  
50 [FVC]); (3) preoperative symptoms (shortness of breath, coughing, depression, anxiety, pain,  
51  
52 and sleep disturbance); and (4) treatment and medical variables (surgery type, cancer stage,  
53  
54 and adjuvant therapy).  
55  
56  
57  
58  
59

## 60 **2. Material and methods**



1  
2  
3 This study is part of a larger, longitudinal investigation of symptoms in patients with LC  
4 who were eligible for surgery,[22–24] for which data were collected prior to surgery and  
5 prospectively at four time points up to one year after surgery. Here, we analyzed the data  
6 collected prior to surgery and at the five-month follow-up to gain insight into patients'  
7 experiences with fatigue before surgery and after the immediate postoperative period.  
8  
9  
10  
11  
12  
13  
14

### 15 16 *2.1. Patients and settings*

17  
18 Patients were included if they were 18 years or older, scheduled for primary LC surgery,  
19 and could understand, read, and write Norwegian. Patients with a benign or metastatic  
20 disease, whose surgery was canceled, or who had cognitive impairment, were excluded. We  
21 recruited patients from three university hospitals in Norway: Oslo University Hospital, St.  
22 Olav University Hospital, and Haukeland University Hospital. The recruitment started in  
23 November 2010 and was completed in March 2012.  
24  
25  
26  
27  
28  
29  
30  
31  
32  
33

### 34 35 *2.2 Patient and Public Involvement*

36  
37 The study was funded Norwegian Cancer Society (NCS). The study was discussed with  
38 representatives from the Lung Cancer subgroup before the study started and an article about  
39 the main result from the study is published in the membership journal for patients with lung  
40 cancer.  
41  
42  
43  
44  
45  
46

### 47 48 *2.3. Study procedures*

49  
50 Hospital research staff approached patients and explained the study purpose: 91% of the  
51 participants were recruited in the hospital 1–3 days before surgery, and the remainder in  
52 outpatient clinics prior to surgery. Patients signed a written informed consent before they  
53 completed several self-report questionnaires with information on sociodemographic and  
54 clinical characteristics, and symptoms both prior to surgery and at a five-month follow-up.  
55  
56  
57  
58  
59  
60

1  
2  
3 Permission to use the questionnaire was obtained from the copyright detectors before study  
4 start. Data on type of tumor, cancer stage, surgery type, and lung function were collected from  
5 the patients' medical records. FEV1 and FVC were measured preoperatively using a  
6 spirometer. Five months after surgery, patients received questionnaires by regular mail, along  
7 with a postage-paid return envelope.  
8  
9  
10  
11  
12  
13  
14

## 15 *2.4. Instruments and assessment*

### 16 *2.4.1. Sociodemographic, clinical, symptom, and fatigue characteristics*

17  
18 Patients provided information on their sex, marital status, living situation, level of  
19 education, and employment status. Information on age, smoking status, FEV1, tumor  
20 histology, cancer stage, type of surgery, pre- and postoperative treatment, postoperative  
21 complications, and TNM classification were collected from patients' medical records; the  
22 TNM classification is a system for cancer staging based on tumor (T), node (N), and  
23 metastasis (M).  
24  
25  
26  
27  
28  
29  
30  
31  
32  
33  
34

### 35 *2.4.2. Comorbidities*

36  
37 Comorbidities were measured using the Self-administered Comorbidity Questionnaire-  
38 19 (SCQ-19),[25] on which scores can range from 0 to 57, with a higher score indicating a  
39 more severe comorbidity profile. The SCQ includes 16 comorbidities and three optional  
40 conditions. Patients indicated whether or not they had the comorbid condition (yes/no); if they  
41 had the condition they were asked if they received treatment for it; and finally if it limited  
42 their activities. The SCQ-19 has well-established validity and reliability and has been used to  
43 assess comorbidity in Norwegian oncology patients.[25] Only the number of comorbidities  
44 was used in the present study.  
45  
46  
47  
48  
49  
50  
51  
52  
53  
54  
55

### 56 *2.4.3. Fatigue*

1  
2  
3 The Lee Fatigue Scale (LFS),[5] was used to measure fatigue at baseline and five-month  
4 follow-up. The LFS consists of 18 items designed to assess fatigue (13 items) and energy (5  
5 items). We used only the 13 fatigue items in this study. Patients were asked to rate each item  
6 on a 0–10 scale, with a higher score indicating greater fatigue severity. A fatigue score was  
7 calculated using the mean of the 13 items at each measurement. The LFS has well-established  
8 validity and reliability.[26,27] Fatigue scores at baseline were defined as preoperative fatigue  
9 and at five-month follow-up as postoperative fatigue.

#### 2.4.4. *Shortness of breath and cough*

21 The European Organization for Research and Treatment of Cancer Quality-of-Life  
22 Questionnaire – Lung Cancer Module (EORTC QLQ-LC13),[28] was used to measure  
23 shortness of breath and cough. Patients were asked to rate their severity on each shortness of  
24 breath and cough item using a four-point Likert scale where 1 = not at all; 2 = a little; 3 =  
25 quite a bit; and 4 = very much. The EORTC QLQ-LC13 has been validated in Norwegian LC  
26 patients.[29,30]

#### 2.4.5. *Depression*

36 The Center for Epidemiologic Studies – Depression Scale (CES-D),[31] was used to  
37 measure depression symptoms. The scale has 20 items related to depression and patients were  
38 asked to report how they felt during the past week. Each item was rated on a four-point Likert  
39 scale and scores ranged from 0 to 60, with a higher score indicating a higher level of  
40 depression. A total depression score was calculated as the mean of all the sub scores.  
41 Acceptable reliability and validity have been reported in a previous study.[32]

#### 2.4.6. *Anxiety*

54 The State-Trait Anxiety Inventory (STAI, Y-2),[33] was used to measure anxiety. The  
55 STAI includes 20 items related to anxiety rated on a four-point Likert scale. Scores range  
56  
57  
58  
59  
60

1  
2  
3 from 20 to 80, with a higher score indicating a higher level of anxiety. The STAI has been  
4  
5 validated in patients with LC.[34]  
6  
7

#### 8 9 *2.4.7. Sleep disturbance*

10 The General Sleep Disturbance Scale (GSDS),[35] was used to measure sleep  
11  
12 disturbance. The GSDS consists of 21 items related to sleep disturbance. Each item is rated on  
13  
14 a numeric rating scale ranging from 0 (never) to 7 (every day). A sleep disturbance score was  
15  
16 calculated from the mean of all scale items. Higher scores indicate more severe sleep  
17  
18 disturbance. The GSDS has been validated in cancer patients.[26]  
19  
20  
21

#### 22 23 *2.4.8. Pain*

24 The Brief-Pain Inventory (BPI),[36] was used to measure pain interference. The BPI is  
25  
26 a multidimensional questionnaire measuring pain intensity (four items), pain interference  
27  
28 (seven items), pain relief (one item), and pain location (body map). Only pain interference  
29  
30 was used in the present study. The seven interference items (general activity, normal work,  
31  
32 walking ability, mood, relationships with other people, sleep, and enjoyment of life) were  
33  
34 combined into a single interference item. The measurement scale ranges from 0 to 10, with  
35  
36 higher scores indicating more pain interfering with daily living. The BPI has been validated in  
37  
38 Norwegian cancer patients.[37]  
39  
40  
41  
42  
43

#### 44 45 *2.5. Ethics*

46 The Regional Ethics Committee for the South-East 2010/1508, and the Institutional Review  
47  
48 Boards (Personvernombudet) at each hospital approved the study. Each participant received  
49  
50 written information about the study and signed informed consent. The article complies with  
51  
52 the STROBE guidelines.[38]  
53  
54  
55  
56

#### 57 58 *2.6. Statistical analyses*

59  
60

1  
2  
3 Descriptive statistics were used to describe the sociodemographic, clinical, and  
4  
5 treatment characteristics of the patient sample. Differences between sexes were analyzed  
6  
7 using a chi-squared test for categorical variables and an independent Student's *t* test for the  
8  
9 continuous variables. One-way ANOVA was used to explore differences within groups on  
10  
11 levels of pre- and postoperative fatigue. Patients with more than 20% of missing items on the  
12  
13 LFS were excluded from analyses. If the scales had less than 20% missing, the score were  
14  
15 calculated from the mean of the particular patient's valid scores. The bivariate relationships  
16  
17 between symptoms and fatigue at baseline were assessed using Pearson correlation analyses.  
18  
19 Variables with significant correlation coefficients on bivariate analyses were included in a  
20  
21 hierarchical linear analyses.  
22  
23  
24  
25

26 Two stepwise multivariate regression analyses were performed. In the first analysis,  
27  
28 preoperative fatigue was the dependent variable. In the second analysis, postoperative fatigue  
29  
30 was the dependent variable. In both analyses, age and sex were entered in step one. Clinical  
31  
32 variables including comorbidities, FEV1, and FVC were entered in step two. Finally, the  
33  
34 symptom variables of shortness of breath, cough, depression, anxiety, sleep disturbance, and  
35  
36 pain interference were entered in step three. For the second regression analysis, the model  
37  
38 also included a fourth step in which preoperative fatigue was included as an independent  
39  
40 variable.  
41  
42  
43  
44

45 The entry of variables in different model steps was carried out according to theoretical  
46  
47 and logical considerations. For all analyses,  $p < 0.05$  was considered statistically significant.  
48  
49 Post hoc statistical power was calculated for hierarchical multiple regression: with an effect  
50  
51 size ( $f^2$ ) for set B (five-month follow-up) at 0.15 (medium), [39] 11 predictors in set A and 12  
52  
53 in set B, a probability level of 0.05, and a sample size of 196, the observed power for the  
54  
55 addition of set B was 0.95. [40] Data were analyzed using SPSS (IBM Corporation, Armonk,  
56  
57 NY, USA) version 24.0.  
58  
59  
60

**Table 1**

Demographic, clinical, and treatment characteristics of the patients (N=196).

|                                    | Total | Men          | Women        | Statistics     | p-value         |
|------------------------------------|-------|--------------|--------------|----------------|-----------------|
| <b>Sociodemographics</b>           |       |              |              |                |                 |
| Age in years (mean, SD)            | 196   | 66.7 (8.2)   | 64.1 (7.9)   | t 2.28 (194)   | <b>0.024</b>    |
|                                    |       | % (n)        | % (n)        | $\chi$ (df)    |                 |
| Cohabitation (living with someone) | 147   | 84.0 (89)    | (69.0) 58    | 5.95 (1)       | <b>0.015</b>    |
| Work status                        |       |              |              |                |                 |
| Full or part time                  | 58    | 27.6 (29)    | 34.9 (29)    | .80 (2)        | 0.25            |
| Sick leave or disability           | 47    | 22.9 (24)    | 27.7 (23)    |                |                 |
| Retired                            | 83    | 49.5 (52)    | 37.3 (31)    |                |                 |
| Education                          |       |              |              |                |                 |
| ≤12 years                          | 158   | 81.1(86)     | 86.7 (72)    | 1.07 (1)       | 0.30            |
| ≥13 years                          | 31    | 18.9 (20)    | 13.3 (11)    |                |                 |
| <b>Clinical variables</b>          |       |              |              |                |                 |
|                                    |       | Mean (SD)    | Mean (SD)    | t (df)         |                 |
| Comorbidities (SCQ)                | 193   | 3.72 (3.3)   | 4.67 (4.0)   | -1.74 (161.4)  | 0.08            |
| FEV1 (expected %)                  | 190   | 76.7 (19.2)  | 80.4 (22.8)  | -1.20 (188)    | 0.23            |
| FVC (expected %)                   | 183   | 91.2 (15.00) | 102.4 (19.4) | t -4.30(149.8) | <b>&lt;.001</b> |
| Symptoms                           |       |              |              |                |                 |
| Fatigue (LFS) baseline             | 196   | 2.50 (2.0)   | 2.48 (2.0)   | t -0.07 (194)  | 0.94            |
| Fatigue (LFS) 5-month follow-up    |       |              |              |                |                 |

### 3. Results

#### 3.1. Sample characteristics

Totally, 375 patients with presumptive primary lung cancer were asked to participate in the study and 307 agreed to participate (Fig 1). Among these, 196 patients who answered the questionnaire both preoperatively and at five-month follow-up and had valid fatigue scores at both measurement points were included in the study. Sample characteristics are shown in Table 1. Although women were younger, more women lived alone, reported higher FVC, less shortness of breath and had a higher proportion of adenocarcinoma cancer type, and was more active in physiotherapy and rehabilitation than men, their level of fatigue did not differ. Most of the sample had adenocarcinoma stage 1A or 1B, received no preoperative treatment and had a lobectomy.

The mean preoperative fatigue scores were 2.49 (SD=2.02) for men and 2.47 (SD=1.96) for women. At the five-month follow-up, the postoperative fatigue scores were 3.0 (SD=2.1) for men and 2.9 (SD=2.1) for women. There were no significant differences in fatigue level preoperatively between those who completed or did not complete the postoperative fatigue scale.

|    |                                |     |             |             |               |                 |
|----|--------------------------------|-----|-------------|-------------|---------------|-----------------|
| 1  |                                |     |             |             |               |                 |
| 2  |                                |     |             |             |               |                 |
| 3  |                                | 196 | 3.0 (2.2)   | 2.9 (2.1)   | t 0.32 (194)  | 0.75            |
| 4  | Shortness of breath            |     |             |             |               |                 |
| 5  | (EORTC)                        | 194 | 2.24 (0.8)  | 2.00 (0.7)  | t -2.28 (192) | <b>0.023</b>    |
| 6  | Cough (EORTC)                  | 193 | 1.96 (0.7)  | 1.98 (0.8)  | t -0.11 (191) | 0.92            |
| 7  | Depression (CES-D)             | 190 | 10.49 (8.8) | 12.92 (8.8) | t -1.89 (188) | 0.06            |
| 8  | Anxiety (STAI)                 | 192 | 51.22 (3.1) | 50.80 (2.9) | t 0.96 (190)  | 0.34            |
| 9  | Sleep disturbance (GSDS)       | 191 | 2.26 (1.05) | 2.32 (1.00) | t -0.36 (189) | 0.72            |
| 10 |                                |     | % (n)       | % (n)       | $\chi$ (df)   | p-value         |
| 11 | Pain (BPI) yes                 | 171 | 40.0 (38)   | 51.3 (39)   | 2.18 (1)      | 0.14            |
| 12 | <b>Pathology and treatment</b> |     |             |             |               |                 |
| 13 | Tumor type                     |     |             |             |               |                 |
| 14 | Adenocarcinoma                 | 106 | 45.0 (50)   | 65.9 (56)   | 24.00 (4)     | <b>&lt;.001</b> |
| 15 | Squamous cell                  | 66  | 45.0 (50)   | 12.9 (11)   |               |                 |
| 16 | Small cell                     | 5   | 1.8 (2)     | 3.5 (3)     |               |                 |
| 17 | Carcinoid                      | 6   | 1.8 (2)     | 4.7 (4)     |               |                 |
| 18 | Other                          | 18  | 6.3 (7)     | 12.9 (11)   |               |                 |
| 19 | Stage of cancer disease        |     |             |             |               |                 |
| 20 | IA                             | 58  | 25.2 (27)   | 41.3 (31)   | 9.12 (4)      | 0.06            |
| 21 | IB                             | 59  | 35.5 (38)   | 28.0 (21)   |               |                 |
| 22 | II                             | 35  | 24.3 (26)   | 12.0 (9)    |               |                 |
| 23 | IIIA                           | 31  | 14.0 (15)   | 18.7 (14)   |               |                 |
| 24 | IIIB-IV                        | 1   | 0.9 (1)     | -           |               |                 |
| 25 | Preoperative treatment         |     |             |             |               |                 |
| 26 | None                           | 192 | 97.3 (108)  | 98.8 (84)   | 1.58 (3)      | 0.66            |
| 27 | Radiation                      | 1   | 0.9 (1)     | -           |               |                 |
| 28 | Chemotherapy                   | 1   | 0.9 (1)     | -           |               |                 |
| 29 | Combination                    | 2   | 0.9 (1)     | 1.2 (1)     |               |                 |
| 30 | Type of surgery                |     |             |             |               |                 |
| 31 | Lobectomy                      | 133 | 67.6 (75)   | 68.2 (58)   | 1.26 (4)      | 0.87            |
| 32 | Bilobectomy                    | 15  | 6.3 (7)     | 9.4 (8)     |               |                 |
| 33 | Pneumonectomy                  | 18  | 9.0 (10)    | 9.4 (8)     |               |                 |
| 34 | Wedge resection                | 18  | 9.9 (11)    | 8.2 (7)     |               |                 |
| 35 | Thoracoscopic                  | 12  | 7.2 (8)     | 4.7 (4)     |               |                 |
| 36 | Postoperative complications    |     |             |             |               |                 |
| 37 | Reoperation                    | 9   | 3.6 (4)     | 5.9 (5)     | 0.57 (1)      | 0.45            |
| 38 | Pneumonia                      | 50  | 27 (30)     | 23.8 (20)   | 0.26 (1)      | 0.61            |
| 39 | Posttreatment                  |     |             |             |               |                 |
| 40 | Radiation therapy              | 16  | 9.9 (11)    | 5.9 (5)     | 1.04 (1)      | 0.31            |
| 41 | Chemotherapy                   | 57  | 30.6 (34)   | 27.1 (23)   | 0.30 (1)      | 0.59            |
| 42 | Physiotherapy                  | 58  | 24.3 (26)   | 38.1 (32)   | 4.24 (1)      | <b>0.04</b>     |
| 43 | Rehabilitation                 | 24  | 7.5 (8)     | 19.3 (16)   | 5.90 (1)      | <b>0.015</b>    |

Abbreviations: SCQ, Self-administered Comorbidity Questionnaire; FEV1, forced expiratory volume in one second; FVC, Forced vital Capacity; EORTC, European Organization for Research and Treatment of Cancer; CES-D, Center for Epidemiologic Studies – Depression Scale; STAI, State-Trait Anxiety Inventory; GSDS, General Sleep Disturbance Scale; BPI, Brief Pain Inventory; LFS, Lee Fatigue Inventory.

Notes: Fatigue, range 0–10, higher score indicating greater fatigue severity; shortness of breath and cough range 1–4, higher score indicating more shortness of breath and cough; depression, range 0–60, higher score indicating more depression; pain, range 0–10, higher score indicating more pain; comorbidity, range 0–57, higher score indicating more comorbidity; anxiety, range 20–80, higher score indicating more anxiety; sleep disturbance, range 0–7, higher score indicating more severe sleep disturbance. Bold numbers represent significant relationships.

### 3.2. Bivariate analyses

The bivariate analyses between the symptom variables are shown in Table 2. Medical and treatment characteristics including cancer stage, tumor type, type of surgery, and postoperative treatment such as radiation therapy, chemotherapy, physiotherapy, and rehabilitation were not significantly correlated with either preoperative or postoperative fatigue and, thus, were not included in the final model. Sociodemographic variables including

work, education, and cohabitation were excluded before the final analyses for the same reason.

**Table 2**

Correlation matrix for symptoms at baseline, and fatigue baseline and 5-month follow-up (N=196).

|                                   | 1     | 2     | 3     | 4     | 5     | 6     | 7     | 8    | 9    | 10    | 11    | 12    | 13 |
|-----------------------------------|-------|-------|-------|-------|-------|-------|-------|------|------|-------|-------|-------|----|
| 1 Age                             | 1     |       |       |       |       |       |       |      |      |       |       |       |    |
| 2 Sex                             | -.16* | 1     |       |       |       |       |       |      |      |       |       |       |    |
| 3 FEV1                            | .06   | .09   | 1     |       |       |       |       |      |      |       |       |       |    |
| 4 FVC                             | .02   | .31*  | .65*  | 1     |       |       |       |      |      |       |       |       |    |
| 5 Fatigue (LFS) baseline          | -.23* | -.01  | -.19* | -.14  | 1     |       |       |      |      |       |       |       |    |
| 6 Fatigue (LFS) 5-month follow-up | -.16* | -.02  | -.22* | -.17* | .52*  | 1     |       |      |      |       |       |       |    |
| 7 Comorbidities (SCQ)             | .04   | .13   | -.23* | -.12  | .29*  | .31*  | 1     |      |      |       |       |       |    |
| 8 Shortness of breath (EORTC)     | -.03  | -.16* | -.25* | -.24* | .35*  | .62*  | .31*  | 1    |      |       |       |       |    |
| 9 Cough (EORTC)                   | -.04  | .01   | -.14  | -.15* | .33*  | .33*  | -.04  | .17* | 1    |       |       |       |    |
| 10 Depression (CES-D)             | -.15* | .14   | -.07  | -.03  | .47*  | .31*  | .17*  | .17* | .12  | 1     |       |       |    |
| 11 Anxiety (STAI)                 | .06   | -.07  | .08   | -.00  | -.24* | -.12  | -.08  | -.01 | -.1  | -.28* | 1     |       |    |
| 12 Sleep disturbance (GSDS)       | -.22* | .03   | -.09  | -.08  | .50*  | .41*  | .18*  | .26* | .14  | .57*  | -.22* | 1     |    |
| 13 Pain (BPI)                     | .1    | -.11  | .09   | .1    | -.25* | -.23* | -.18* | -.15 | -.02 | -.08  | .18*  | -.23* | 1  |

\* Correlation is significant at the 0.05 level (2-tailed).

Abbreviations: SCQ, Self-administered Comorbidity Questionnaire; FEV1, Forced expiratory volume in one second; FVC, Forced vital Capacity; EORTC, European Organization for Research and Treatment of Cancer; CES-D, Center for Epidemiologic Studies – Depression Scale; STAI, State-Trait Anxiety Inventory; GSDS, General Sleep Disturbance Scale; BPI, Brief Pain Inventory; LFS, Lee Fatigue Inventory.

### 3.3. Multivariate analyses

Hierarchical multiple regression analyses were used to assess the impact of the selected variables on levels of preoperative and postoperative fatigue (Table 3). Age, sex, and clinical variables were unrelated to preoperative fatigue.



**Table 3**

Results from the two hierarchical multivariate linear regression analyses with preoperative fatigue and postoperative fatigue (at 5-month follow-up) were used as dependent variables (N=196).

|                                   | Preoperative fatigue |              |                  | Postoperative fatigue |              |                  |
|-----------------------------------|----------------------|--------------|------------------|-----------------------|--------------|------------------|
|                                   | Beta                 | $\beta$      | p-value          | Beta                  | $\beta$      | p-value          |
| <b>Sociodemographics</b>          |                      |              |                  |                       |              |                  |
| Age                               | -0.04                | -0.14        | 0.13             | -0.02                 | -0.07        | 0.26             |
| Sex                               | -0.39                | -0.10        | 0.16             | 0.03                  | 0.01         | 0.93             |
| Explained variance ( $R^2$ )      |                      | <b>5.5%</b>  | <b>0.01</b>      |                       | 2.9%         | 0.10             |
| <b>Clinical variables</b>         |                      |              |                  |                       |              |                  |
| FEV1                              | -0.00                | -0.05        | 0.63             | -0.00                 | -0.03        | 0.71             |
| FVC                               | -0.01                | 0.04         | 0.61             | 0.00                  | 0.04         | 0.65             |
| Comorbidity                       | 0.10                 | 0.18         | 0.008            | 0.05                  | 0.08         | 0.19             |
| $R^2$ change                      |                      | <b>10.6%</b> | <b>&lt;0.001</b> |                       | <b>12.1%</b> | <b>&lt;0.001</b> |
| Explained variance                |                      | 16.1         |                  |                       | 15.0         |                  |
| <b>Fatigue at baseline</b>        |                      |              |                  |                       |              |                  |
| Fatigue                           |                      |              |                  | <b>0.18</b>           | <b>0.17</b>  | <b>0.03</b>      |
| $R^2$ change                      |                      |              |                  |                       | <b>16.2%</b> | <b>&lt;0.001</b> |
| Explained variance                |                      |              |                  |                       | 31.2%        |                  |
| <b>Other symptoms at baseline</b> |                      |              |                  |                       |              |                  |
| Shortness of breath               | 0.33                 | 0.13         | 0.06             | <b>1.27</b>           | <b>0.46</b>  | <b>&lt;0.001</b> |
| <b>Cough</b>                      | <b>0.64</b>          | <b>0.25</b>  | <b>&lt;0.001</b> | <b>0.50</b>           | <b>0.18</b>  | <b>0.004</b>     |
| Depression                        | <b>0.05</b>          | <b>0.23</b>  | <b>0.003</b>     | 0.01                  | 0.04         | 0.63             |
| Anxiety                           | -0.05                | -0.07        | 0.29             | 0.00                  | 0.00         | 0.95             |
| Sleep disturbance                 | <b>0.02</b>          | <b>0.20</b>  | <b>0.01</b>      | 0.01                  | 0.11         | 0.12             |
| Pain                              | <b>0.44</b>          | <b>0.20</b>  | <b>0.01</b>      | -0.29                 | -0.07        | 0.26             |
| $R^2$ change                      |                      | <b>30.5%</b> | <b>&lt;0.001</b> |                       | <b>23.2%</b> | <b>&lt;0.001</b> |
| Explained variance                |                      | 46.6%        |                  |                       | 54.3%        |                  |

Abbreviations: FEV1, Forced expiratory volume in one second; FVC, Forced vital capacity.

Note: Bold numbers represent significant relationships.

At baseline, patients who reported pain scored higher on fatigue (M=2.9, SD=2.05) compared with patients who reported no pain (M=2.03, SD=1.8, t=3.28, p=0.001). Patients who reported pain at baseline also reported higher mean fatigue at five-month follow-up (M=3.54, SD=2.21) compared with those who reported no pain at baseline (M=2.55,

1  
2  
3 SD=2.04,  $t=3.08$ ,  $p=0.002$ ). Among the reported symptoms, coughing, depression, sleep  
4 disturbance, and pain interference were related to preoperative fatigue after controlling for  
5  
6  
7  
8 age, sex, clinical variables, and the other symptoms. The total model explained 46.6% of  
9  
10 variance, while 30.5% was explained by the other symptoms.

11  
12 At five-month follow-up, the only variables that predicted fatigue after controlling for  
13  
14 age, sex, clinical variables, preoperative fatigue, and symptoms were shortness of breath and  
15  
16 coughing. The total model explained 54.3% of variance, while 23.2% was explained by the  
17  
18  
19 other symptoms.  
20  
21

## 22 **4. Discussion**

23  
24  
25 To our knowledge, this is the first study examining fatigue in surgically treated patients  
26  
27 with LC , including both preoperative data and data from five-month follow-up. Preoperative  
28  
29 fatigue was significantly correlated with comorbidities and all the included symptoms in the  
30  
31 bivariate analyses, while postoperative fatigue was significantly correlated with comorbidities  
32  
33 and four out of six measured symptoms. However, shortness of breath was the only baseline  
34  
35 variable that predicted postoperative fatigue.  
36  
37  
38  
39

### 40 *4.1. Relationship between postoperative fatigue level and preoperative symptoms*

41  
42  
43 Shortness of breath, coughing, depression, anxiety, sleep disturbance, and pain  
44  
45 interference were significantly correlated with level of preoperative fatigue. Except for  
46  
47 anxiety and pain interference, the same symptoms were associated with postoperative fatigue  
48  
49 in the bivariate analyses at five-month follow-up. Before surgery, cough was significantly  
50  
51 associated with fatigue, while shortness of breath was the symptom predictive of  
52  
53 postoperative fatigue. Shortness of breath is a prevalent and disturbing symptom in these  
54  
55 patients, which is physiologically based on disease location, damage caused by lung tumors,  
56  
57 and history of smoking. Shortness of breath requires intensive effort to breath, thus making  
58  
59  
60

1  
2  
3 patients tired. The constant use of rib and respiratory muscles caused by shortness of breath  
4  
5 can exacerbate fatigue.[41] These patients may benefit from prescribed bronchodilators and  
6  
7 non-pharmacological treatment such as physical activity. For some, it may be useful to learn  
8  
9 how to manage shortness of breath by controlled breathing techniques and practicing calming  
10  
11 techniques during shortness of breath episodes.  
12  
13

14  
15 Consistent with previous research, we found that fatigue in patients with LC undergoing  
16  
17 surgery is correlated with their symptoms and might cluster with other symptoms.[2,42]  
18  
19 Cheville et al.,[2] found a cluster of fatigue, cough, and dyspnea in LC survivors lasting for  
20  
21 eight years; however, in a later study, the same group found that the cluster did not predict  
22  
23 patient outcomes but that fatigue and dyspnea, alone and together, were sufficient to predict  
24  
25 important outcomes.[8]  
26  
27

#### 28 29 *4.2. Relationship between fatigue and patients' disease characteristics and treatment* 30 31

32  
33 Although comorbidities did not predict postoperative fatigue in our analyses, there was  
34  
35 a bivariate relationship with fatigue both pre- and postoperatively. Others have also reported  
36  
37 correlations between comorbidity and fatigue.[6,12] Respiratory comorbidities and cardiac  
38  
39 disease are especially related to fatigue in patients with LC.[3,43] We also found a correlation  
40  
41 between fatigue and spirometry results, with lower FEV1 and FVC related to higher levels of  
42  
43 fatigue at both measurement times. These variables were related to comorbidity and are an  
44  
45 important factor in identifying and screening patients at risk for developing fatigue. Poorer  
46  
47 respiratory test outcomes could indicate shortness of breath or respiratory comorbidities, such  
48  
49 as COPD, and may lead to distress and exhaustion and contribute to fatigue in these patients.  
50  
51

52  
53 Surgery type has been established as a predictor of fatigue in LC survivors and surgery  
54  
55 has been associated with a greater symptom burden generally.[21] In the present study,  
56  
57 treatment and disease variables did not correlate with postoperative fatigue at five-month  
58  
59 follow-up. These findings are inconsistent with other reports in which correlations have been  
60

1  
2  
3 found between fatigue and chemotherapy,[9] and radiotherapy.[11] However, our findings are  
4  
5 consistent with those from a general cancer population on the symptom cluster of pain,  
6  
7 fatigue, sleep disturbance, and depression. That group found that symptom experiences were  
8  
9 independent of demographic, disease, or treatment effects; their findings suggest that different  
10  
11 subgroups of patients may harbor different determinants (e.g., genetic) for experiencing  
12  
13 symptoms and suggested etiology that are independent of demographic, disease, or treatment  
14  
15 characteristics.[44]  
16  
17

#### 18 19 20 *4.3. Limitations* 21

22  
23 Some study limitations need to be acknowledged. There was a five-month gap between  
24  
25 the two measurement points. During this time, other factors might have influenced patients'  
26  
27 fatigue experience. Surgery type might also be a predictor of patient fatigue.[21] In this study,  
28  
29 only 6% of patients had video-assisted thoracoscopy; thus, it is not possible to determine  
30  
31 whether this influenced postoperative fatigue. Detailed information on symptom management  
32  
33 interventions such as physiotherapy and rehabilitation was not collected. However, even if  
34  
35 these variables had been included, no detailed information about the type and length of these  
36  
37 therapies was available.  
38  
39  
40

#### 41 42 **5. Conclusions** 43

44  
45 Based on the findings in the present study, patients should be screened for symptoms  
46  
47 before surgery and offered treatment for their symptoms to reduce pre- and postoperative  
48  
49 fatigue. Special attention should be given to treating patients' shortness of breath, since this is  
50  
51 a modifiable predictor for which treatments are available. Further research should pay specific  
52  
53 attention to the pair of symptoms of shortness of breath and fatigue, and to the effects on  
54  
55 fatigue and QOL when shortness of breath is treated.  
56  
57  
58  
59  
60

1  
2  
3  
4  
5  
6  
7  
8  
9  
10  
11  
12  
13  
14  
15  
16  
17  
18  
19  
20  
21  
22  
23  
24  
25  
26  
27  
28  
29  
30  
31  
32  
33  
34  
35  
36  
37  
38  
39  
40  
41  
42  
43  
44  
45  
46  
47  
48  
49  
50  
51  
52  
53  
54  
55  
56  
57  
58  
59  
60

**Fig. 1.** Flowchart of the enrollment and exclusion of patients in the study.

For peer review only

## Acknowledgements

We thank all of the patients who kindly participated and the nurses and physicians at Oslo University Hospital, St. Olav University Hospital, and Haukeland University Hospital who facilitated data collection.

## Footnotes

**Contributors:** TR and TO conceptualised the study. TO wrote the protocol manuscript and TR contributed to protocol development. TO had responsibility for data collection. TH and AL conducted the data analyses and drafted the initial report. TO and TR critically reviewed and edited the manuscript. All authors read and approved the final manuscript. Each author contributed to interpreting the analyses and to critically revising the article, and approved the final draft.

**Funding:** The study was funded by the Norwegian Cancer Association.

**Patient consent:** Each participant signed informed consent.

**Ethics approval** The Regional Ethics Committee for the South-East 2010/1508, and the Institutional Review Boards (Personvernombudet) at each hospital approved the study. Each participant received written information about the study and signed informed consent.

**Data availability statement:** All data relevant to the study are included in the article.

**Competing interests:** None declared.

**Provenance and peer review** Not commissioned; externally peer reviewed.

## References

1 Kreftregisteret. Available from <https://www.kreftregisteret.no/en/General/Publications/Cancer-in-Norway/cancer-in-norway-2017/> (Accessed 10 May 2019).

- 1  
2  
3 2 Cheville AL, Novotny PJ, Sloan JA et al. Fatigue, dyspnea, and cough comprise a  
4 persistent symptom cluster up to five years after diagnosis with lung cancer. *J Pain Symptom*  
5 *Manage* 2011;42:202–212. doi:10.1016/j.jpainsymman.2010.10.257.  
6
- 7 3 Hung R, Krebs P, Coups EJ, et al. Fatigue and functional impairment in early-stage non-  
8 small cell lung cancer survivors. *J Pain Symptom Manage* 2011;41:426–435.  
9 doi:10.1016/j.jpainsymman.2010.05.017.  
10
- 11 4 Portenoy RK, Itri LM. Cancer-related fatigue: guidelines for evaluation and  
12 Management. *Oncologist* 1991;4:1–10. doi:10.1097/01893697-200119020-00038.  
13
- 14 5 Lee KA, Hicks G, Nino-Murcia G, Validity and reliability of a scale to assess fatigue.  
15 *Psychiatry Res* 1990;36:291–298. doi:10.1016/0165-1781(91)90027.  
16
- 17 6 Carnio S, Di Stefano RF, Novello S. Fatigue in lung cancer patients: symptom burden  
18 and management of challenges. *Lung Cancer (Auct)* 2016;7:73–82. doi:  
19 10.2147/LCTT.S85334 [Published Online First:9 May 2016]  
20
- 21 7 Sarna L, Padilla G, Holmes C, et al. Quality of life of long-term survivors of non-small-cell  
22 lung cancer. *J. Clin Oncol* 2002;20:2920–2929. doi:10.1200/JCO.2002.09.045.  
23
- 24 8 Cheville AL, Novotny PJ, Sloan JA, et al. The value of a symptom cluster of fatigue,  
25 dyspnea, and cough in predicting clinical outcomes in lung cancer survivors. *J Pain Symptom*  
26 *Manag* 2011;42:213–221. doi:10.1016/j.jpainsymman.2010.11.005.  
27
- 28 9 Long NH, Thanasilp S, Thato R. A causal model for fatigue in lung cancer patients  
29 receiving chemotherapy. *Eur J Oncol Nurs* 2016;21:242-247.  
30 doi:10.1016/j.ejon.2015.10.010.  
31
- 32 10 Molassiotis A, Lowe M, Blackhall F, et al. A qualitative exploration of a respiratory distress  
33 symptom cluster in lung cancer: cough, breathlessness and fatigue. *Lung Cancer*  
34 2011;71:94–102. doi:10.1016/j.lungcan.2010.04.002.  
35
- 36 11 Ozturk A, Sarihan S, Ercan I, et al. Evaluating quality of life and pulmonary function of  
37 long-term survivors of non-small cell lung cancer treated with radical or postoperative  
38 radiotherapy. *Am J Clin Oncol* 2009;32:65-72. doi:10.1097/COC.0b013e31817e6ec2.  
39
- 40 12 Sarna L, Cooley ME, Brown JK, et al. Symptom severity 1 to 4 months after thoracotomy  
41 for lung cancer. *Am J of Crit Care* 2008;17:455-467.  
42
- 43 13 Poghosyan H, Sheldon LK, Leveille SG, et al. Health-related quality of life after surgical  
44 treatment in patients with non-small cell lung cancer: a systematic review. *Lung Cancer*  
45 2013;81:11-26. doi:10.1016/j.lungcan.2013.03.013.  
46
- 47 14 Hoffman AJ, Given BA, von Eye A, et al. Relationships among pain, fatigue, insomnia,  
48 and gender in persons with lung cancer. *Oncol Nurs Forum* 2007;34:785.  
49 <http://ezproxy.diastud.no/docview/223105953?accountid=37793>.  
50
- 51 15 Wright F, Melkus GDE, Hammer M, et al. Trajectories of evening fatigue in oncology  
52 outpatients receiving chemotherapy. *J Pain Symptom Manag* 2015;50:163-175.  
53 doi:10.1016/j.jpainsymman.2015.02.015.  
54
- 55 16 Wright F, Melkus GDE, Hammer M, et al. Predictors and trajectories of morning fatigue  
56 are distinct from evening fatigue. *J Pain Symptom Manag* 2015;50:176-189.  
57 doi:10.1016/j.jpainsymman.2015.02.016  
58  
59  
60

- 1  
2  
3  
4 17 Storey DJ, Waters RA, Hibberd CJ, et al. Clinically relevant fatigue in cancer outpatients:  
5 the Edinburgh Cancer Centre symptom study. *Ann Oncol* 2007;18:1861-1869.  
6 doi:10.1093/annonc/mdm349. [Published Online First: 5 September 2007]  
7
- 8 18 Huang X, Zhou W, Zhang Y. Features of fatigue inpatients with early-stage non-small  
9 cell lung cancer. *J Res Med Sci*; 2015;20:268–272.  
10
- 11 19 Lerdal A, Wahl A, Rustøen T, Hanestad BR, Moum T. Fatigue in the general population: a  
12 translation and test of the psychometric properties of the Norwegian version of the fatigue  
13 severity scale. *Scand J Public Health* 2005;33:123-130. doi:10.1080/14034940410028406  
14
- 15 20 Loge JH, Ekeberg Ø, Kaasa S. Fatigue in the general Norwegian population: Normative  
16 data and associations. *J Psychosomatic Research* 1998;45:53-65. doi:10.1016/S0022-  
17 3999(97)00291-2  
18
- 19 21 Yang P, Chevillat AL, J.A. Wampfler JA, et al., Quality of life and symptom burden among  
20 long term lung cancer survivors: changing and adapting, *J Thorac Oncol* 2012;7:64–70.  
21 [doi:10.1097/JTO.0b013e3182397b3e](https://doi.org/10.1097/JTO.0b013e3182397b3e).  
22
- 23 22 Oksholm T, Rustoen T, Cooper B, et al. Trajectories of symptom occurrence and severity  
24 from before through five months after lung cancer surgery. *J Pain Symptom Manag*  
25 *2015;49:995–1015*. doi:10.1016/j.jpainsymman.2014.11.297.  
26
- 27 23 Oksholm T, Miaskowski C, Solberg S, et al., Changes in symptom occurrence and  
28 severity before and after lung cancer surgery, *Cancer Nurs* 2015;38:351–357. doi:  
29 10.1097/NCC.000000000000198. [Published Online First: 7 July 2014]  
30
- 31 24 Oksholm T, Miaskowski C, J.S. Kongerud JS, et al. Does age influence the symptom  
32 experience of lung cancer patients prior to surgery? *Lung Cancer* 2013;82:156–161.  
33 doi:10.1016/j.lungcan.2013.06.016.  
34
- 35 25 Sangha O, Stucki G, Liang MH, et al. The Self-Administered Comorbidity Questionnaire: a  
36 new method to assess comorbidity for clinical and health services research. *Arthrit Care Res*  
37 *2003;49:156–163*. [doi:10.1002/art.10993](https://doi.org/10.1002/art.10993).  
38
- 39 26 Miaskowski C, Lee KA. Pain, fatigue, and sleep disturbances in oncology outpatients  
40 receiving radiation therapy for bone metastasis: a pilot study. *J Pain Symptom Manag*  
41 *1999;17:320–332*. doi:10.1016/S0885-3924(99)00008-1.  
42
- 43 27 Lerdal A, Kottorp A, Gay CL, et al. Lee Fatigue and Energy Scales: exploring  
44 aspects of validity in a sample of women with HIV using an application of a Rasch model,  
45 *Psychiatry Res* 2013;205;241–246. [doi:10.1016/j.psychres.2012.08.031](https://doi.org/10.1016/j.psychres.2012.08.031).  
46
- 47 28 Bergman B, Aaronson N, Ahmedzai S, et al. The EORTC QLQ-LC13: a modular  
48 supplement to the EORTC core quality of life questionnaire (QLQ-C30) for use in  
49 lung cancer clinical trials. *Eur J Cancer* 1994;30:635–642. [doi:10.1016/0959](https://doi.org/10.1016/0959-8049(94)90535-5)  
50 8049(94)90535-5.  
51
- 52 29 Giesinger JM, Kieffer JM, Fayers PM, et al. Replication and validation of higher order  
53 models demonstrated that a summary score for the EORTC QLQ-C30 is robust. *J Clin*  
54 *Epidemiol* 2016;69:79–88. doi:10.1016/j.jclinepi.2015.08.007.  
55
- 56 30 Michelson H, Bolund C, Nilsson B, et al. Health-related quality of life  
57 measured by the EORTC QLQ-C30: reference values from a large sample of the Swedish  
58  
59  
60



- 1  
2  
3 population. *Acta Oncol* 2000;39:477–484. doi:10.1080/028418600750013384  
4  
5 31 Radloff LS. The CES-D scale: a self-report depression scale for the general population,  
6 *Appl Psych Mea*. 1977;1:385–401. doi:10.1177/014662167700100306.  
7  
8 32 Sheehan JT, Fifield J, Reisine S, et al. The measurement structure of the Center  
9 for Epidemiologic Studies Depression Scale. *J Pers Assess* 1995;64:507-521.  
10 doi:10.1207/s15327752jpa6403\_9.  
11  
12 33 Spielberger CD, Gorsuch RC, Lushene RE, et al. Manual for the  
13 State-Trait Anxiety Inventory (Form Y): Self-Evaluation Questionnaire. Consulting  
14 Psychologists Press, Palo Alto, CA, 1983.  
15  
16 34 Cataldo JK, Brodsky JL. Lung cancer stigma, anxiety, depression and symptom  
17 Severity. *Oncology* 2013;85:33–40. doi:10.1159/000350834.  
18  
19 35 Lee KA. Self-reported sleep disturbances in employed women. *Sleep* 1992;15:493-  
20 498. doi:10.1093/sleep/15.6.493.  
21  
22 36 Cleeland CS, Measurement and prevalence of pain in cancer. *Seminars in Onc Nurs*  
23 1985;1:87–92. doi: 10.1016/S0749-2081(85)80041-3.  
24  
25 37 Klepstad P, Loge JH, Borchgrevink PC, et al. The Norwegian Brief Pain Inventory  
26 Questionnaire: translation and validation in cancer pain patients. *J Pain Symptom Manag*  
27 2002;24: 517–525. doi /10.1016/S0885-3924(02)00526-2.  
28  
29 38 von Elm E, Altman DG, Egger M, et al. Strengthening the Reporting of Observational  
30 Studies in Epidemiology (STROBE) statement: guidelines for reporting observational studies.  
31 *BMJ* 2007;335:806-8.  
32  
33 39 Cohen J. A power primer: quantitative methods in psychology. *Psychological Bulletin*  
34 1992;112;155-159. doi:10.1037/0033-2909.112.1.155  
35  
36 40 Soper DS. Post-hoc statistical power calculator for hierarchical multiple regression  
37 (Software) 2017. Available from: <http://www.danielsoper.com/statcalc/references.aspx?id=17>  
38 (Accessed 10 May 2019).  
39  
40 41 Esper P, Heidrich D. Symptom clusters in advanced illness. *Seminars in Oncology*  
41 *Nursing* 2005;25:20–28. doi:10.1053/j.soncn.2004.10.004.  
42  
43 42 Lin S, Chen Y, Yang L, et al. Pain, fatigue, disturbed sleep and distress comprised a  
44 symptom cluster that related to quality of life and functional status of lung cancer surgery  
45 patients. *J Clinical Nurs* 2013; 22.9-10:1281–1289. doi:10.1111/jocn.12228. [Published  
46 Online First: 10 April 2013]  
47  
48 43 Yun YH, Kim YA, Min YH, et al., Health-related quality of life in disease-free survivors of  
49 surgically treated lung cancer compared with the general population, *Ann Surg*  
50 2012;255:1000–1007. doi:10.1097/SLA.0b013e31824f1e9e.  
51  
52 44 Miaskowski C, Cooper BA, Paul SM, et al. Subgroups of patients with cancer with  
53 different symptom experiences and quality-of-life outcomes: a cluster analysis. *Oncol Nurs*  
54 *Forum* 2006;33.  
55  
56  
57  
58  
59  
60



STROBE Statement—Checklist of items that should be included in reports of *cohort studies*

|                              | Item No | Recommendation                                                                                                                                                                                    |
|------------------------------|---------|---------------------------------------------------------------------------------------------------------------------------------------------------------------------------------------------------|
| <b>Title and abstract</b>    | 1       | (a) Indicate the study's design with a commonly used term in the title or the abstract<br>Page: 1 and 2                                                                                           |
|                              |         | (b) Provide in the abstract an informative and balanced summary of what was done and what was found<br>Page: 2                                                                                    |
| <b>Introduction</b>          |         |                                                                                                                                                                                                   |
| Background/rationale         | 2       | Explain the scientific background and rationale for the investigation being reported<br>Page: 3 and 4                                                                                             |
| Objectives                   | 3       | State specific objectives, including any prespecified hypotheses<br>Page: 4                                                                                                                       |
| <b>Methods</b>               |         |                                                                                                                                                                                                   |
| Study design                 | 4       | Present key elements of study design early in the paper<br>Page: 5                                                                                                                                |
| Setting                      | 5       | Describe the setting, locations, and relevant dates, including periods of recruitment, exposure, follow-up, and data collection<br>Page: 5                                                        |
| Participants                 | 6       | (a) Give the eligibility criteria, and the sources and methods of selection of participants. Describe methods of follow-up<br>Page: 5 and 6                                                       |
|                              |         | (b) For matched studies, give matching criteria and number of exposed and unexposed<br>Page: Not actual                                                                                           |
| Variables                    | 7       | Clearly define all outcomes, exposures, predictors, potential confounders, and effect modifiers. Give diagnostic criteria, if applicable<br>Page: 5-8                                             |
| Data sources/<br>measurement | 8*      | For each variable of interest, give sources of data and details of methods of assessment (measurement). Describe comparability of assessment methods if there is more than one group<br>Page: 5-8 |
| Bias                         | 9       | Describe any efforts to address potential sources of bias<br>Page: Not actual                                                                                                                     |
| Study size                   | 10      | Explain how the study size was arrived at<br>Page: 10                                                                                                                                             |
| Quantitative variables       | 11      | Explain how quantitative variables were handled in the analyses. If applicable, describe which groupings were chosen and why<br>Page:                                                             |
| Statistical methods          | 12      | (a) Describe all statistical methods, including those used to control for confounding<br>Page: 9                                                                                                  |
|                              |         | (b) Describe any methods used to examine subgroups and interactions<br>Page: 9                                                                                                                    |
|                              |         | (c) Explain how missing data were addressed<br>Page: 9                                                                                                                                            |
|                              |         | (d) If applicable, explain how loss to follow-up was addressed<br>Page: 9                                                                                                                         |
|                              |         | (e) Describe any sensitivity analyses<br>Page: 9                                                                                                                                                  |

| <b>Results</b>           |     |                                                                                                                                                                                                                           |
|--------------------------|-----|---------------------------------------------------------------------------------------------------------------------------------------------------------------------------------------------------------------------------|
| Participants             | 13* | (a) Report numbers of individuals at each stage of study—eg numbers potentially eligible, examined for eligibility, confirmed eligible, included in the study, completing follow-up, and analysed<br>Page: Fig 1, page 10 |
|                          |     | (b) Give reasons for non-participation at each stage<br>Page: Fig 1, page 10                                                                                                                                              |
|                          |     | (c) Consider use of a flow diagram<br>Page: Fig 1, page 10                                                                                                                                                                |
| Descriptive data         | 14* | (a) Give characteristics of study participants (eg demographic, clinical, social) and information on exposures and potential confounders<br>Page: 11                                                                      |
|                          |     | (b) Indicate number of participants with missing data for each variable of interest<br>Page: 11                                                                                                                           |
|                          |     | (c) Summarise follow-up time (eg, average and total amount)<br>Page: 11                                                                                                                                                   |
| Outcome data             | 15* | Report numbers of outcome events or summary measures over time<br>Page: 10 -12                                                                                                                                            |
| Main results             | 16  | (a) Give unadjusted estimates and, if applicable, confounder-adjusted estimates and their precision (eg, 95% confidence interval). Make clear which confounders were adjusted for and why they were included<br>Page: 12  |
|                          |     | (b) Report category boundaries when continuous variables were categorized<br>Page: 12                                                                                                                                     |
|                          |     | (c) If relevant, consider translating estimates of relative risk into absolute risk for a meaningful time period<br>Page: Not actual                                                                                      |
| Other analyses           | 17  | Report other analyses done—eg analyses of subgroups and interactions, and sensitivity analyses<br>Page: Not actual                                                                                                        |
| <b>Discussion</b>        |     |                                                                                                                                                                                                                           |
| Key results              | 18  | Summarise key results with reference to study objectives<br>Page: 14                                                                                                                                                      |
| Limitations              | 19  | Discuss limitations of the study, taking into account sources of potential bias or imprecision. Discuss both direction and magnitude of any potential bias<br>Page: 2 + 16                                                |
| Interpretation           | 20  | Give a cautious overall interpretation of results considering objectives, limitations, multiplicity of analyses, results from similar studies, and other relevant evidence<br>Page: 15 and 16                             |
| Generalisability         | 21  | Discuss the generalisability (external validity) of the study results<br>Page: 16                                                                                                                                         |
| <b>Other information</b> |     |                                                                                                                                                                                                                           |
| Funding                  | 22  | Give the source of funding and the role of the funders for the present study and, if applicable, for the original study on which the present article is based<br>Page: 18                                                 |

\*Give information separately for exposed and unexposed groups.

1 **Note:** An Explanation and Elaboration article discusses each checklist item and gives methodological background and  
2 published examples of transparent reporting. The STROBE checklist is best used in conjunction with this article (freely  
3 available on the Web sites of PLoS Medicine at <http://www.plosmedicine.org/>, Annals of Internal Medicine at  
4 <http://www.annals.org/>, and Epidemiology at <http://www.epidem.com/>). Information on the STROBE Initiative is  
5 available at <http://www.strobe-statement.org>.  
6  
7  
8  
9  
10  
11  
12  
13  
14  
15  
16  
17  
18  
19  
20  
21  
22  
23  
24  
25  
26  
27  
28  
29  
30  
31  
32  
33  
34  
35  
36  
37  
38  
39  
40  
41  
42  
43  
44  
45  
46  
47  
48  
49  
50  
51  
52  
53  
54  
55  
56  
57  
58  
59  
60

For peer review only
